# Supplementary material for: Structural Relevance of Intramolecular H-Bonding in Ortho-Hydroxyaryl Schiff Bases: The Case of 3-(5-bromo-2-hydroxybenzylideneamino) Phenol
Source: MDPI journal article supplement (doi:10.3390/molecules26092814), 2021-05-10
Supplement: s1 [file s1]

## Supporting Information for

### **Structural relevance of intramolecular H-bonding in *ortho*-hydroxyaryl Schiff bases: the case of 3-(5-bromo-2-hydroxybenzylideneamino)phenol**

İsa Sıdır,<sup>1,2,\*</sup> Yadigar Gülseven Sıdır,<sup>1,2</sup> Sándor Góbi,<sup>2,3</sup> Halil Berber,<sup>4</sup> Rui Fausto<sup>2,\*</sup>

<sup>1</sup> *Department of Physics, Faculty of Science and Arts, Bitlis Eren University, 13000 Bitlis, Turkey.*

<sup>2</sup> *CQC, Department of Chemistry, University of Coimbra, 3004-535 Coimbra, Portugal.*

<sup>3</sup> *MTA-ELTE Lendület Laboratory Astrochemistry Research Group, Institute of Chemistry, ELTE Eötvös Loránd University, H-1518 Budapest, Hungary.*

<sup>4</sup> *Eskişehir Technical University, Faculty of Science, Department of Chemistry, 26470, Eskişehir, Turkey.*

## **INDEX**

|                                                                                                                                                                                                                                                                                                                  |    |
|------------------------------------------------------------------------------------------------------------------------------------------------------------------------------------------------------------------------------------------------------------------------------------------------------------------|----|
| <b>Figure S1.</b> IR spectrum of BHAP in a KBr pellet at room temperature.....                                                                                                                                                                                                                                   | 2  |
| <b>Figure S2.</b> <sup>1</sup> H-NMR spectrum of BHAP in DMSO-d <sub>6</sub> , at room temperature.....                                                                                                                                                                                                          | 2  |
| <b>Figure S3.</b> <sup>13</sup> C-NMR spectrum of BHAP in DMSO-d <sub>6</sub> , at room temperature.....                                                                                                                                                                                                         | 3  |
| <b>Figure S4.</b> Comparison between the matrix isolation IR spectrum of BHAP and the simulated spectra based on the DFT(B3LYP)/6-311++G(d,p) calculated IR spectra of the relevant conformers of <i>E</i> - and <i>Z</i> - geometrical isomers of the enol-imine and keto-amine tautomers of the compound ..... | 4  |
| <b>Table S1.</b> Cartesian coordinates of the optimized structures of the conformers of BHAP isomers.....                                                                                                                                                                                                        | 5  |
| <b>Table S2.</b> Calculated IR spectra of conformers I, II, V and VI (BHAP <i>E</i> -enol-imine isomer).....                                                                                                                                                                                                     | 17 |

---

\* Corresponding authors: İsa Sıdır: isidir@beu.edu.tr; Rui Fausto: rfausto@ci.uc.pt

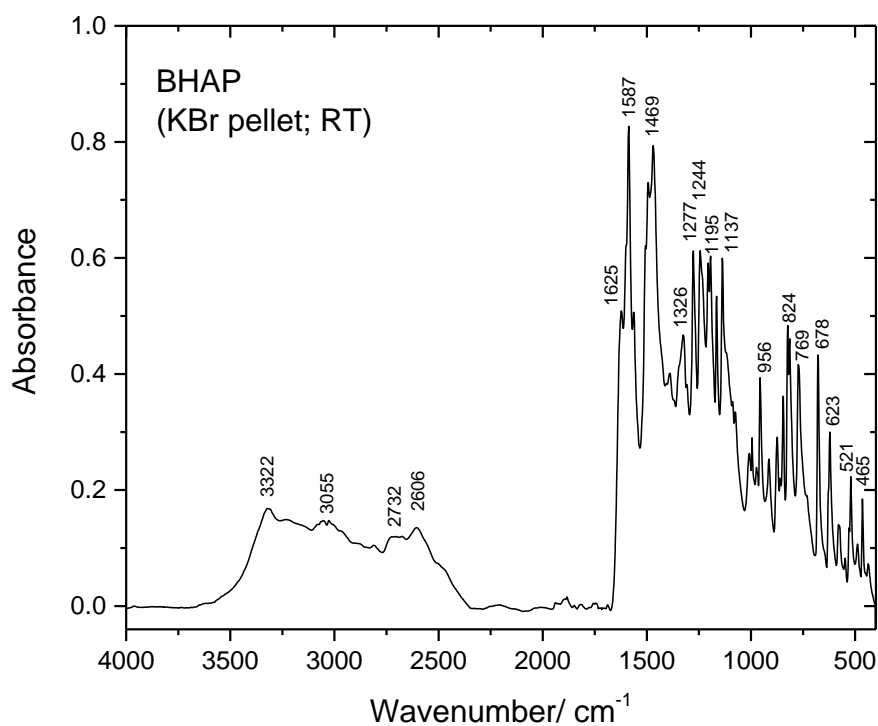

**Figure S1.** IR spectrum of BHAP in a KBr pellet at room temperature (RT).

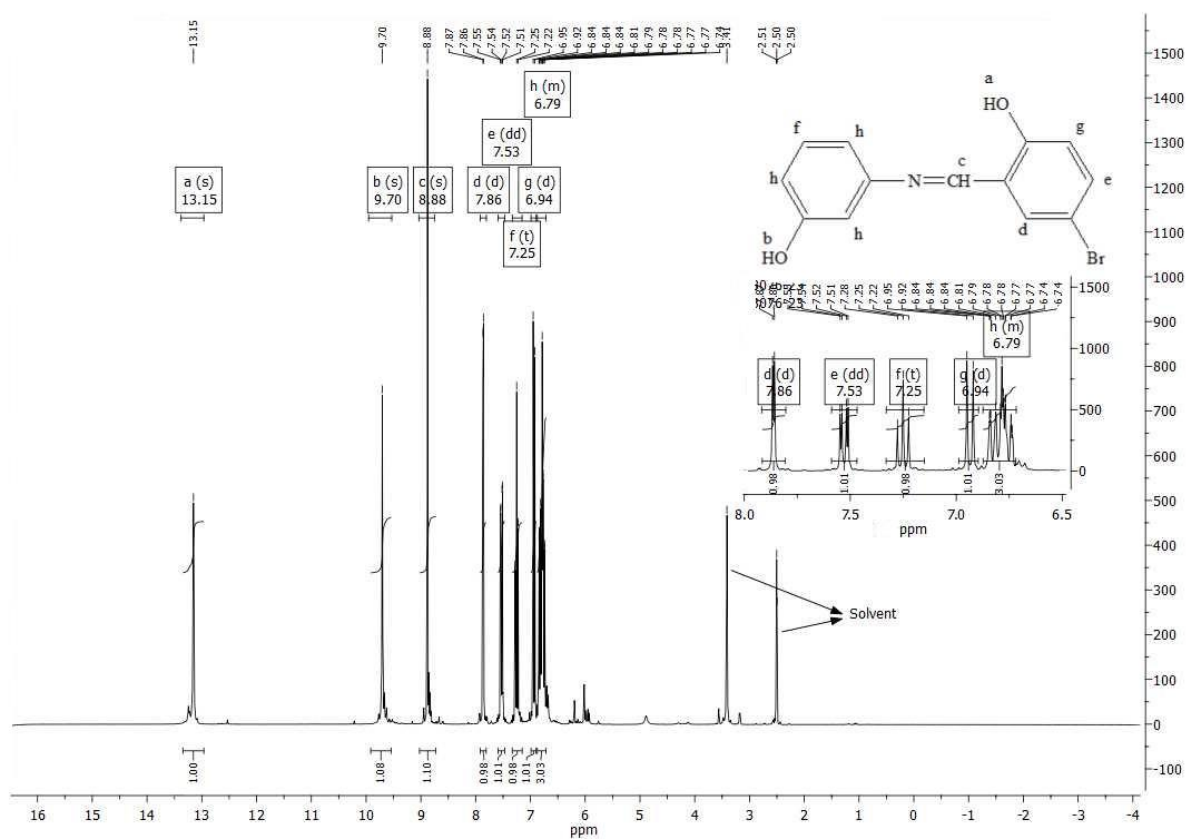

**Figure S2.**  $^1\text{H}$ -NMR spectrum of BHAP in  $\text{DMSO-d}_6$  at room temperature.

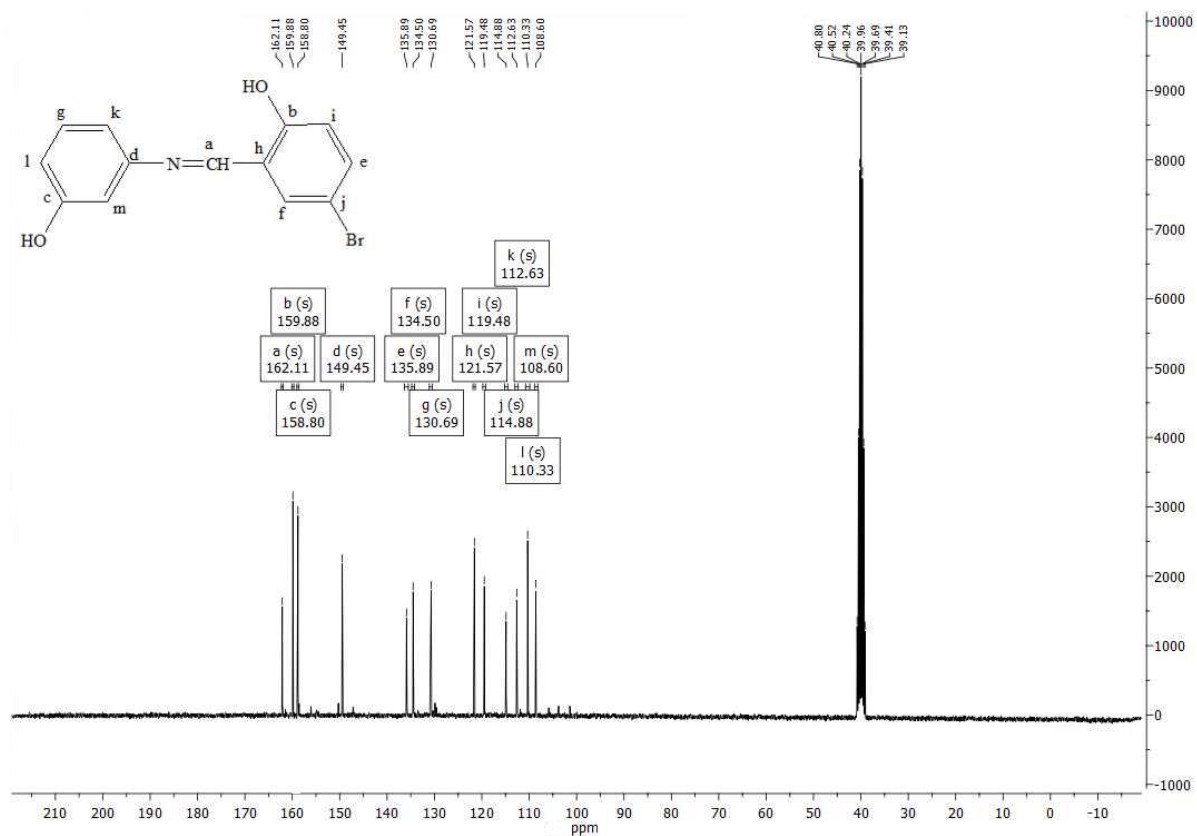

**Figure S3.**  $^{13}\text{C}$ -NMR spectrum of BHAP in  $\text{DMSO-d}_6$ , at room temperature.

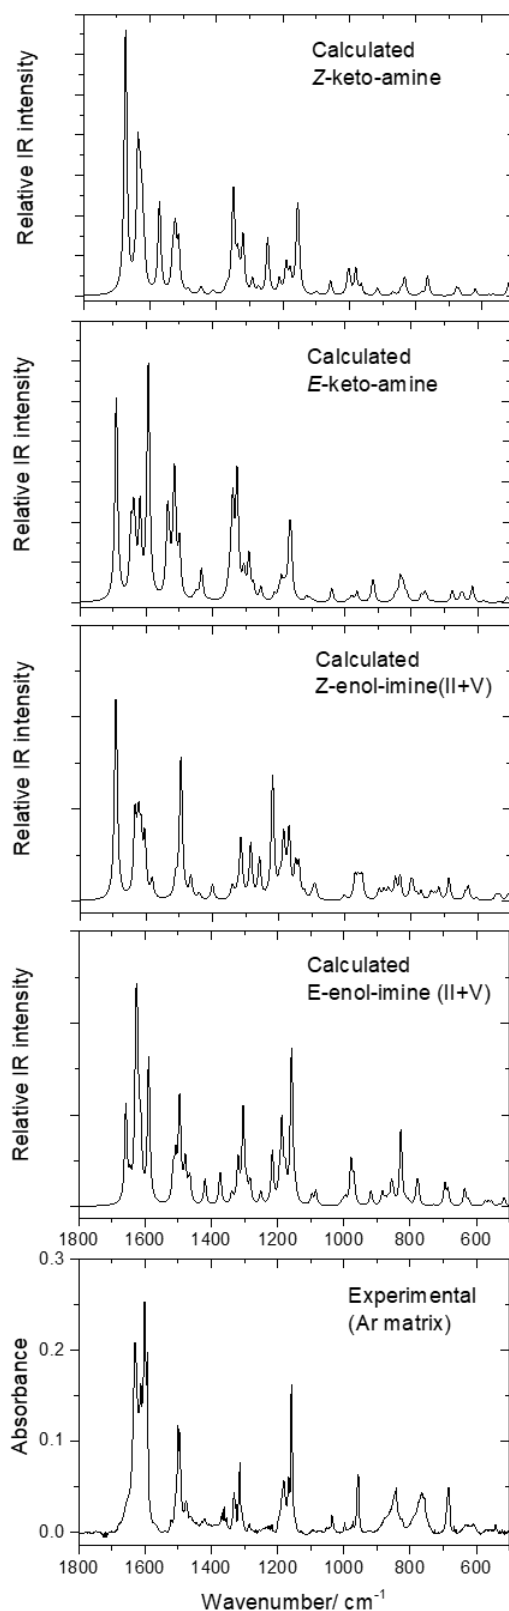

**Figure S4.** Comparison between the matrix isolation IR spectrum of BHAP (*bottom panel*) and the simulated spectra based on the DFT(B3LYP)/6-311++G(d,p) calculated IR spectra of the relevant conformers of *E*- and *Z*- geometrical isomers of the enol-imine and keto-amine tautomers of the compound. For *E*-keto-amine and *Z*-keto-amine forms, the pairs of conformers IV and VII, and II and V of the “keto-amine forms of the *E*-enol-imine isomer” (see Figure 3 and Table 4 of the article) were considered.

**Table S1.** Cartesian coordinates (Å) of the optimized structures of the conformers of BHAP isomers.

| <i>E</i> -enol-imine I   |              |              |              | <i>E</i> -enol-imine II |              |              |              |
|--------------------------|--------------|--------------|--------------|-------------------------|--------------|--------------|--------------|
| 6                        | 5.279746000  | 0.739249000  | 0.842961000  | 6                       | 5.278080000  | 0.754509000  | 0.820823000  |
| 6                        | 5.666919000  | -0.498200000 | 0.338904000  | 6                       | 5.661841000  | -0.491736000 | 0.326690000  |
| 6                        | 4.717654000  | -1.303459000 | -0.292985000 | 6                       | 4.709419000  | -1.305203000 | -0.289575000 |
| 6                        | 3.394030000  | -0.880281000 | -0.405041000 | 6                       | 3.385483000  | -0.884134000 | -0.400454000 |
| 6                        | 3.009772000  | 0.363370000  | 0.118780000  | 6                       | 3.005907000  | 0.361357000  | 0.112042000  |
| 6                        | 3.965747000  | 1.184273000  | 0.726798000  | 6                       | 3.964722000  | 1.193009000  | 0.708209000  |
| 7                        | 1.689064000  | 0.843963000  | 0.019939000  | 7                       | 1.685034000  | 0.843483000  | 0.016362000  |
| 6                        | 0.679027000  | 0.055511000  | 0.140218000  | 6                       | 0.676170000  | 0.052744000  | 0.133089000  |
| 6                        | -0.687401000 | 0.519103000  | -0.015572000 | 6                       | -0.690572000 | 0.517199000  | -0.016873000 |
| 8                        | 5.148198000  | -2.500047000 | -0.797862000 | 8                       | 5.015501000  | -2.529801000 | -0.818245000 |
| 6                        | -1.747296000 | -0.393303000 | 0.142448000  | 6                       | -1.749811000 | -0.396954000 | 0.135360000  |
| 6                        | -3.055677000 | 0.023302000  | -0.006762000 | 6                       | -3.058591000 | 0.021005000  | -0.006815000 |
| 6                        | -3.345366000 | 1.356526000  | -0.314476000 | 6                       | -3.349248000 | 1.356724000  | -0.302319000 |
| 6                        | -2.314369000 | 2.270141000  | -0.471152000 | 6                       | -2.318887000 | 2.271981000  | -0.453307000 |
| 6                        | -0.979195000 | 1.872999000  | -0.325727000 | 6                       | -0.983350000 | 1.873550000  | -0.315016000 |
| 8                        | -0.015385000 | 2.789569000  | -0.484167000 | 8                       | -0.019694000 | 2.791415000  | -0.467786000 |
| 35                       | -4.488406000 | -1.233822000 | 0.207566000  | 35                      | -4.491091000 | -1.237876000 | 0.199911000  |
| 1                        | 6.016948000  | 1.369792000  | 1.326672000  | 1                       | 6.018436000  | 1.390123000  | 1.292793000  |
| 1                        | 6.690217000  | -0.845037000 | 0.408973000  | 1                       | 6.693423000  | -0.820547000 | 0.405272000  |
| 1                        | 2.671286000  | -1.494901000 | -0.932533000 | 1                       | 2.678459000  | -1.519965000 | -0.918554000 |
| 1                        | 3.663722000  | 2.149799000  | 1.112569000  | 1                       | 3.662742000  | 2.161982000  | 1.085109000  |
| 1                        | 0.811286000  | -1.005282000 | 0.382152000  | 1                       | 0.810249000  | -1.009328000 | 0.366507000  |
| 1                        | 4.417004000  | -2.962134000 | -1.220854000 | 1                       | 5.954948000  | -2.708557000 | -0.705855000 |
| 1                        | -1.524660000 | -1.426420000 | 0.381992000  | 1                       | -1.526072000 | -1.432211000 | 0.364119000  |
| 1                        | -4.373485000 | 1.675563000  | -0.429698000 | 1                       | -4.377731000 | 1.676538000  | -0.412181000 |
| 1                        | -2.522109000 | 3.306330000  | -0.708290000 | 1                       | -2.527324000 | 3.310050000  | -0.681310000 |
| 1                        | 0.856508000  | 2.336754000  | -0.339486000 | 1                       | 0.852376000  | 2.335964000  | -0.330194000 |
|                          |              |              |              |                         |              |              |              |
| <i>E</i> -enol-imine III |              |              |              | <i>E</i> -enol-imine IV |              |              |              |
| 6                        | 5.250087000  | 0.545654000  | 1.067422000  | 6                       | 5.247716000  | 0.557065000  | 1.056449000  |
| 6                        | 5.617738000  | -0.622553000 | 0.404438000  | 6                       | 5.611422000  | -0.616739000 | 0.394466000  |
| 6                        | 4.677828000  | -1.273080000 | -0.395043000 | 6                       | 4.668439000  | -1.271831000 | -0.398054000 |
| 6                        | 3.381942000  | -0.772198000 | -0.515097000 | 6                       | 3.372582000  | -0.771966000 | -0.516805000 |
| 6                        | 3.015819000  | 0.400822000  | 0.164227000  | 6                       | 3.011562000  | 0.400139000  | 0.159487000  |
| 6                        | 3.969065000  | 1.073139000  | 0.940421000  | 6                       | 3.967337000  | 1.079099000  | 0.932287000  |
| 7                        | 1.734232000  | 0.964925000  | 0.055506000  | 7                       | 1.730398000  | 0.966833000  | 0.053836000  |
| 6                        | 0.705551000  | 0.212936000  | 0.100833000  | 6                       | 0.702572000  | 0.213605000  | 0.098930000  |
| 6                        | -0.683620000 | 0.659557000  | -0.051803000 | 6                       | -0.687145000 | 0.659790000  | -0.050679000 |
| 8                        | 5.086489000  | -2.404880000 | -1.051352000 | 8                       | 4.958664000  | -2.415848000 | -1.095423000 |
| 6                        | -1.680877000 | -0.315790000 | 0.120057000  | 6                       | -1.682947000 | -0.317738000 | 0.117187000  |
| 6                        | -3.025598000 | -0.006311000 | -0.001918000 | 6                       | -3.028098000 | -0.009230000 | -0.002699000 |
| 6                        | -3.422894000 | 1.292312000  | -0.303403000 | 6                       | -3.427225000 | 1.289896000  | -0.299366000 |
| 6                        | -2.451999000 | 2.271301000  | -0.479619000 | 6                       | -2.457670000 | 2.270885000  | -0.472003000 |
| 6                        | -1.090375000 | 1.978470000  | -0.360273000 | 6                       | -1.095702000 | 1.979317000  | -0.353680000 |
| 8                        | -0.149470000 | 2.936597000  | -0.538948000 | 8                       | -0.156402000 | 2.940148000  | -0.527909000 |
| 35                       | -4.346764000 | -1.373652000 | 0.244600000  | 35                      | -4.347841000 | -1.378830000 | 0.239209000  |
| 1                        | 5.981217000  | 1.058479000  | 1.682290000  | 1                       | 5.982024000  | 1.072079000  | 1.665605000  |
| 1                        | 6.619145000  | -1.027567000 | 0.479326000  | 1                       | 6.620868000  | -1.007345000 | 0.480008000  |
| 1                        | 2.666349000  | -1.265679000 | -1.165744000 | 1                       | 2.671655000  | -1.282697000 | -1.165429000 |
| 1                        | 3.683589000  | 1.991002000  | 1.438336000  | 1                       | 3.681641000  | 1.998430000  | 1.427339000  |
| 1                        | 0.802501000  | -0.866804000 | 0.287722000  | 1                       | 0.801283000  | -0.866338000 | 0.281311000  |
| 1                        | 4.361321000  | -2.756224000 | -1.578158000 | 1                       | 5.879063000  | -2.658145000 | -0.950289000 |
| 1                        | -1.380438000 | -1.329648000 | 0.355512000  | 1                       | -1.380765000 | -1.332399000 | 0.346800000  |
| 1                        | -4.471512000 | 1.541505000  | -0.400485000 | 1                       | -4.476206000 | 1.537951000  | -0.395582000 |
| 1                        | -2.757027000 | 3.286400000  | -0.716711000 | 1                       | -2.764024000 | 3.286458000  | -0.705482000 |
| 1                        | -0.580182000 | 3.772588000  | -0.750697000 | 1                       | -0.589035000 | 3.775059000  | -0.739943000 |

*E*-enol-imine V

|    |              |              |              |
|----|--------------|--------------|--------------|
| 6  | -5.272699000 | -0.021221000 | 0.442529000  |
| 6  | -5.515645000 | -1.263353000 | -0.149386000 |
| 6  | -4.466774000 | -1.938977000 | -0.762208000 |
| 6  | -3.178969000 | -1.406450000 | -0.783353000 |
| 6  | -2.936943000 | -0.167681000 | -0.175279000 |
| 6  | -3.995174000 | 0.532116000  | 0.418774000  |
| 7  | -1.669682000 | 0.448870000  | -0.169721000 |
| 6  | -0.593077000 | -0.244373000 | -0.037142000 |
| 6  | 0.725571000  | 0.359996000  | -0.088983000 |
| 6  | 1.863089000  | -0.451853000 | 0.078243000  |
| 6  | 3.128248000  | 0.100459000  | 0.030229000  |
| 6  | 3.296390000  | 1.472284000  | -0.183899000 |
| 6  | 2.187413000  | 2.287962000  | -0.348644000 |
| 6  | 0.894061000  | 1.752914000  | -0.303601000 |
| 8  | -0.149183000 | 2.578161000  | -0.464404000 |
| 35 | 4.669421000  | -1.018478000 | 0.258070000  |
| 8  | -6.334143000 | 0.612416000  | 1.026913000  |
| 1  | -6.519124000 | -1.669609000 | -0.132185000 |
| 1  | -4.657733000 | -2.892203000 | -1.242103000 |
| 1  | -2.381573000 | -1.926019000 | -1.300056000 |
| 1  | -3.798024000 | 1.499563000  | 0.869490000  |
| 1  | -0.631470000 | -1.325630000 | 0.134939000  |
| 1  | 1.734408000  | -1.515060000 | 0.243853000  |
| 1  | 4.291363000  | 1.897530000  | -0.220501000 |
| 1  | 2.300955000  | 3.352262000  | -0.514350000 |
| 1  | -0.975498000 | 2.030696000  | -0.399332000 |
| 1  | -6.051604000 | 1.457546000  | 1.392073000  |

*E*-enol-imine VI

|    |              |              |              |
|----|--------------|--------------|--------------|
| 6  | -5.264691000 | -0.018394000 | -0.453616000 |
| 6  | -5.507853000 | -1.250841000 | 0.158285000  |
| 6  | -4.460259000 | -1.917851000 | 0.789481000  |
| 6  | -3.177096000 | -1.382106000 | 0.805546000  |
| 6  | -2.936411000 | -0.150340000 | 0.175800000  |
| 6  | -3.988479000 | 0.538131000  | -0.434069000 |
| 7  | -1.667342000 | 0.463118000  | 0.169192000  |
| 6  | -0.593615000 | -0.233642000 | 0.036391000  |
| 6  | 0.727258000  | 0.366221000  | 0.086558000  |
| 6  | 1.861706000  | -0.450066000 | -0.079315000 |
| 6  | 3.128846000  | 0.097572000  | -0.031809000 |
| 6  | 3.302058000  | 1.469118000  | 0.179971000  |
| 6  | 2.196117000  | 2.289100000  | 0.342965000  |
| 6  | 0.900501000  | 1.758893000  | 0.298979000  |
| 8  | -0.138656000 | 2.588555000  | 0.458864000  |
| 35 | 4.666018000  | -1.027767000 | -0.257310000 |
| 8  | -6.245084000 | 0.696380000  | -1.084697000 |
| 1  | -6.506518000 | -1.676382000 | 0.153892000  |
| 1  | -4.653351000 | -2.862779000 | 1.284573000  |
| 1  | -2.379819000 | -1.890556000 | 1.333317000  |
| 1  | -3.812326000 | 1.496977000  | -0.904873000 |
| 1  | -0.635529000 | -1.315033000 | -0.135113000 |
| 1  | 1.729038000  | -1.513012000 | -0.243447000 |
| 1  | 4.298547000  | 1.890878000  | 0.215731000  |
| 1  | 2.313439000  | 3.353339000  | 0.506342000  |
| 1  | -0.968397000 | 2.046738000  | 0.391896000  |
| 1  | -7.082894000 | 0.225622000  | -1.025161000 |

*E*-enol-imine VII

|    |              |              |              |
|----|--------------|--------------|--------------|
| 6  | 5.257719000  | -0.145636000 | 0.502629000  |
| 6  | 5.459419000  | -1.321092000 | -0.225428000 |
| 6  | 4.401428000  | -1.855839000 | -0.951937000 |
| 6  | 3.145566000  | -1.251173000 | -0.950311000 |
| 6  | 2.943152000  | -0.078652000 | -0.207167000 |
| 6  | 4.016480000  | 0.483366000  | 0.498465000  |
| 7  | 1.720104000  | 0.612653000  | -0.176521000 |
| 6  | 0.630308000  | -0.044466000 | -0.090378000 |
| 6  | -0.717999000 | 0.533469000  | -0.109182000 |
| 6  | -1.787183000 | -0.364482000 | 0.051898000  |
| 6  | -3.103479000 | 0.066855000  | 0.046087000  |
| 6  | -3.399717000 | 1.415569000  | -0.122050000 |
| 6  | -2.356597000 | 2.320241000  | -0.283495000 |
| 6  | -1.022236000 | 1.903817000  | -0.280990000 |
| 8  | -0.011488000 | 2.792170000  | -0.442430000 |
| 35 | -4.523466000 | -1.201542000 | 0.269971000  |
| 8  | 6.327936000  | 0.353640000  | 1.196822000  |
| 1  | 6.438107000  | -1.784341000 | -0.222397000 |
| 1  | 4.560145000  | -2.755295000 | -1.536521000 |
| 1  | 2.340857000  | -1.658961000 | -1.549698000 |
| 1  | 3.853130000  | 1.407427000  | 1.043686000  |
| 1  | 0.637955000  | -1.137861000 | 0.024159000  |
| 1  | -1.565390000 | -1.416603000 | 0.183036000  |
| 1  | -4.425591000 | 1.760313000  | -0.127720000 |
| 1  | -2.582620000 | 3.374331000  | -0.415893000 |
| 1  | -0.379280000 | 3.674649000  | -0.565783000 |
| 1  | 6.070518000  | 1.163410000  | 1.649805000  |

*E*-enol-imine VIII

|    |              |              |              |
|----|--------------|--------------|--------------|
| 6  | 5.244724000  | -0.144949000 | 0.521449000  |
| 6  | 5.452628000  | -1.301209000 | -0.235863000 |
| 6  | 4.402074000  | -1.818819000 | -0.990444000 |
| 6  | 3.150197000  | -1.212684000 | -0.983865000 |
| 6  | 2.943260000  | -0.057287000 | -0.210305000 |
| 6  | 4.004772000  | 0.486264000  | 0.521188000  |
| 7  | 1.717006000  | 0.628422000  | -0.180249000 |
| 6  | 0.630862000  | -0.033555000 | -0.093243000 |
| 6  | -0.720322000 | 0.538471000  | -0.109408000 |
| 6  | -1.785586000 | -0.364223000 | 0.049405000  |
| 6  | -3.103473000 | 0.062330000  | 0.047947000  |
| 6  | -3.404948000 | 1.410790000  | -0.112587000 |
| 6  | -2.365587000 | 2.320140000  | -0.271808000 |
| 6  | -1.029589000 | 1.908532000  | -0.274524000 |
| 8  | -0.022164000 | 2.799963000  | -0.434509000 |
| 35 | -4.518591000 | -1.212491000 | 0.268113000  |
| 8  | 6.235109000  | 0.423301000  | 1.278897000  |
| 1  | 6.426540000  | -1.781005000 | -0.246690000 |
| 1  | 4.567767000  | -2.702848000 | -1.596142000 |
| 1  | 2.349577000  | -1.602973000 | -1.600096000 |
| 1  | 3.857058000  | 1.392512000  | 1.094324000  |
| 1  | 0.643547000  | -1.127119000 | 0.021378000  |
| 1  | -1.559580000 | -1.416031000 | 0.175843000  |
| 1  | -4.432091000 | 1.751795000  | -0.114200000 |
| 1  | -2.595683000 | 3.374026000  | -0.398509000 |
| 1  | -0.391127000 | 3.684019000  | -0.541955000 |
| 1  | 7.047996000  | -0.083068000 | 1.181077000  |

*E*-enol-imine IX

|    |              |              |              |
|----|--------------|--------------|--------------|
| 6  | -4.672591000 | -1.681090000 | 1.075823000  |
| 6  | -5.469566000 | -0.941497000 | 0.206405000  |
| 6  | -4.867773000 | -0.017916000 | -0.648968000 |
| 6  | -3.487213000 | 0.177095000  | -0.620178000 |
| 6  | -2.691639000 | -0.565424000 | 0.267592000  |
| 6  | -3.291030000 | -1.517012000 | 1.101950000  |
| 7  | -1.294829000 | -0.423257000 | 0.320769000  |
| 6  | -0.761007000 | 0.734741000  | 0.261027000  |
| 6  | 0.688567000  | 0.942962000  | 0.217596000  |
| 8  | -5.685466000 | 0.667081000  | -1.507482000 |
| 6  | 1.254628000  | 2.228716000  | 0.329544000  |
| 6  | 2.638384000  | 2.397662000  | 0.234639000  |
| 6  | 3.469836000  | 1.305330000  | 0.044866000  |
| 6  | 2.912672000  | 0.026639000  | -0.047660000 |
| 6  | 1.547378000  | -0.158031000 | 0.035501000  |
| 8  | 0.528935000  | 3.368816000  | 0.528939000  |
| 35 | 4.066327000  | -1.484015000 | -0.304368000 |
| 1  | -5.137457000 | -2.406552000 | 1.733768000  |
| 1  | -6.542600000 | -1.079839000 | 0.163027000  |
| 1  | -3.021243000 | 0.868692000  | -1.315578000 |
| 1  | -2.665381000 | -2.101438000 | 1.764468000  |
| 1  | -1.401197000 | 1.629590000  | 0.230432000  |
| 1  | -5.161300000 | 1.249258000  | -2.067250000 |
| 1  | 3.045069000  | 3.397622000  | 0.321501000  |
| 1  | 4.541120000  | 1.442674000  | -0.025718000 |
| 1  | 1.103818000  | -1.141482000 | -0.044794000 |
| 1  | -0.390082000 | 3.164575000  | 0.727146000  |

*E*-enol-imine X

|    |              |              |              |
|----|--------------|--------------|--------------|
| 6  | -4.597741000 | -1.890651000 | 0.871912000  |
| 6  | -5.454771000 | -1.020696000 | 0.196991000  |
| 6  | -4.915748000 | 0.056313000  | -0.508201000 |
| 6  | -3.539364000 | 0.272679000  | -0.527670000 |
| 6  | -2.685638000 | -0.597171000 | 0.162698000  |
| 6  | -3.222696000 | -1.698962000 | 0.846964000  |
| 7  | -1.288039000 | -0.446029000 | 0.162526000  |
| 6  | -0.769458000 | 0.719255000  | 0.237172000  |
| 6  | 0.683879000  | 0.923071000  | 0.182978000  |
| 8  | -5.693010000 | 0.938442000  | -1.212898000 |
| 6  | 1.227915000  | 2.215243000  | 0.300931000  |
| 6  | 2.609854000  | 2.405089000  | 0.249369000  |
| 6  | 3.464519000  | 1.322058000  | 0.080520000  |
| 6  | 2.925717000  | 0.041349000  | -0.036922000 |
| 6  | 1.557666000  | -0.161578000 | 0.011694000  |
| 8  | 0.362557000  | 3.260440000  | 0.465370000  |
| 35 | 4.104355000  | -1.454416000 | -0.271263000 |
| 1  | -5.014001000 | -2.733226000 | 1.412438000  |
| 1  | -6.527498000 | -1.188024000 | 0.204731000  |
| 1  | -3.147643000 | 1.098132000  | -1.109002000 |
| 1  | -2.549843000 | -2.377982000 | 1.355105000  |
| 1  | -1.377867000 | 1.619177000  | 0.361084000  |
| 1  | -6.618986000 | 0.685878000  | -1.137424000 |
| 1  | 3.021978000  | 3.405483000  | 0.341100000  |
| 1  | 4.535200000  | 1.474811000  | 0.041347000  |
| 1  | 1.128622000  | -1.150723000 | -0.078724000 |
| 1  | 0.852704000  | 4.086186000  | 0.535481000  |

*E*-enol-imine XI

|    |              |              |              |
|----|--------------|--------------|--------------|
| 6  | -4.636524000 | -1.766320000 | 1.001811000  |
| 6  | -5.457257000 | -0.970031000 | 0.202201000  |
| 6  | -4.880554000 | 0.016863000  | -0.598190000 |
| 6  | -3.501118000 | 0.217748000  | -0.589367000 |
| 6  | -2.685257000 | -0.576253000 | 0.226685000  |
| 6  | -3.259220000 | -1.590400000 | 1.008973000  |
| 7  | -1.287796000 | -0.431936000 | 0.262859000  |
| 6  | -0.758982000 | 0.729840000  | 0.246153000  |
| 6  | 0.689362000  | 0.944527000  | 0.201774000  |
| 8  | -5.618377000 | 0.820499000  | -1.426092000 |
| 6  | 1.252012000  | 2.231469000  | 0.319796000  |
| 6  | 2.637180000  | 2.401635000  | 0.242830000  |
| 6  | 3.472239000  | 1.311323000  | 0.059978000  |
| 6  | 2.917560000  | 0.032366000  | -0.045144000 |
| 6  | 1.552086000  | -0.154241000 | 0.022752000  |
| 8  | 0.525680000  | 3.371492000  | 0.510496000  |
| 35 | 4.076515000  | -1.475948000 | -0.294211000 |
| 1  | -5.083250000 | -2.539275000 | 1.616732000  |
| 1  | -6.531338000 | -1.127448000 | 0.187957000  |
| 1  | -3.077467000 | 0.962166000  | -1.252312000 |
| 1  | -2.614136000 | -2.213059000 | 1.615599000  |
| 1  | -1.404333000 | 1.620983000  | 0.262295000  |
| 1  | -6.549639000 | 0.583832000  | -1.363976000 |
| 1  | 3.041174000  | 3.402239000  | 0.334601000  |
| 1  | 4.544115000  | 1.450228000  | 0.002640000  |
| 1  | 1.110477000  | -1.137984000 | -0.063914000 |
| 1  | -0.406653000 | 3.172980000  | 0.641011000  |

*E*-enol-imine XII

|    |              |              |              |
|----|--------------|--------------|--------------|
| 6  | -4.602177000 | -1.899580000 | 0.864030000  |
| 6  | -5.461441000 | -1.029328000 | 0.198972000  |
| 6  | -4.924136000 | 0.051513000  | -0.501384000 |
| 6  | -3.547426000 | 0.268491000  | -0.521601000 |
| 6  | -2.687417000 | -0.606486000 | 0.161618000  |
| 6  | -3.223883000 | -1.710015000 | 0.837191000  |
| 7  | -1.290583000 | -0.451303000 | 0.159276000  |
| 6  | -0.772470000 | 0.713706000  | 0.241092000  |
| 6  | 0.680281000  | 0.920083000  | 0.184947000  |
| 8  | -5.801669000 | 0.869122000  | -1.164375000 |
| 6  | 1.222537000  | 2.212625000  | 0.306053000  |
| 6  | 2.604074000  | 2.404675000  | 0.256578000  |
| 6  | 3.460501000  | 1.323197000  | 0.086339000  |
| 6  | 2.923607000  | 0.042086000  | -0.035782000 |
| 6  | 1.555776000  | -0.162911000 | 0.011124000  |
| 8  | 0.355348000  | 3.257446000  | 0.469829000  |
| 35 | 4.104345000  | -1.451081000 | -0.273468000 |
| 1  | -5.015562000 | -2.745962000 | 1.400904000  |
| 1  | -6.533611000 | -1.180738000 | 0.196071000  |
| 1  | -3.136412000 | 1.093775000  | -1.094945000 |
| 1  | -2.550621000 | -2.393006000 | 1.339493000  |
| 1  | -1.380870000 | 1.612494000  | 0.374760000  |
| 1  | -5.317645000 | 1.568129000  | -1.616048000 |
| 1  | 3.014746000  | 3.405414000  | 0.351147000  |
| 1  | 4.531001000  | 1.477544000  | 0.049024000  |
| 1  | 1.128335000  | -1.152527000 | -0.081659000 |
| 1  | 0.846248000  | 4.080935000  | 0.558993000  |

*E*-enol-imine XIII

|    |              |              |              |
|----|--------------|--------------|--------------|
| 6  | -4.860181000 | -1.057304000 | 0.398092000  |
| 6  | -5.524352000 | -0.163989000 | -0.446987000 |
| 6  | -4.783030000 | 0.765974000  | -1.166585000 |
| 6  | -3.396054000 | 0.833736000  | -1.044596000 |
| 6  | -2.734502000 | -0.054497000 | -0.183879000 |
| 6  | -3.474111000 | -1.016758000 | 0.517576000  |
| 7  | -1.338727000 | -0.072232000 | -0.021848000 |
| 6  | -0.682993000 | 1.021730000  | 0.038521000  |
| 6  | 0.779048000  | 1.067642000  | 0.119944000  |
| 6  | 1.472407000  | 2.275018000  | 0.338947000  |
| 6  | 2.869506000  | 2.284773000  | 0.377762000  |
| 6  | 3.587855000  | 1.111322000  | 0.213503000  |
| 6  | 2.902111000  | -0.089787000 | 0.010072000  |
| 6  | 1.523390000  | -0.117300000 | -0.037997000 |
| 8  | -5.627324000 | -1.962501000 | 1.079238000  |
| 8  | 0.866327000  | 3.484318000  | 0.523345000  |
| 35 | 3.897145000  | -1.714812000 | -0.211756000 |
| 1  | -6.601522000 | -0.224642000 | -0.538570000 |
| 1  | -5.293284000 | 1.442642000  | -1.842915000 |
| 1  | -2.827943000 | 1.533960000  | -1.644755000 |
| 1  | -2.945675000 | -1.715734000 | 1.157766000  |
| 1  | -1.221640000 | 1.981007000  | 0.024473000  |
| 1  | 3.375687000  | 3.227387000  | 0.545529000  |
| 1  | 4.669625000  | 1.126400000  | 0.245850000  |
| 1  | 0.981505000  | -1.038741000 | -0.203216000 |
| 1  | -5.063160000 | -2.535656000 | 1.608975000  |
| 1  | -0.089168000 | 3.389514000  | 0.584365000  |

*E*-enol-imine XIV

|    |              |              |              |
|----|--------------|--------------|--------------|
| 6  | -4.856710000 | -1.048371000 | 0.414001000  |
| 6  | -5.515489000 | -0.169422000 | -0.450635000 |
| 6  | -4.770351000 | 0.745174000  | -1.191241000 |
| 6  | -3.386291000 | 0.807973000  | -1.066460000 |
| 6  | -2.730751000 | -0.068884000 | -0.185044000 |
| 6  | -3.470648000 | -1.012887000 | 0.534322000  |
| 7  | -1.334273000 | -0.083647000 | -0.026444000 |
| 6  | -0.682432000 | 1.011640000  | 0.039436000  |
| 6  | 0.779820000  | 1.062221000  | 0.120619000  |
| 6  | 1.469560000  | 2.271994000  | 0.336393000  |
| 6  | 2.866619000  | 2.286273000  | 0.374010000  |
| 6  | 3.588288000  | 1.114601000  | 0.211744000  |
| 6  | 2.906059000  | -0.089124000 | 0.011889000  |
| 6  | 1.527345000  | -0.121068000 | -0.034547000 |
| 8  | -5.523884000 | -1.978234000 | 1.164135000  |
| 8  | 0.859631000  | 3.480235000  | 0.517755000  |
| 35 | 3.906178000  | -1.711396000 | -0.206344000 |
| 1  | -6.595256000 | -0.211333000 | -0.555242000 |
| 1  | -5.278096000 | 1.409644000  | -1.881335000 |
| 1  | -2.812953000 | 1.494313000  | -1.677507000 |
| 1  | -2.966311000 | -1.708474000 | 1.192693000  |
| 1  | -1.224431000 | 1.969331000  | 0.031597000  |
| 1  | 3.370061000  | 3.230786000  | 0.539345000  |
| 1  | 4.670043000  | 1.132840000  | 0.243330000  |
| 1  | 0.987770000  | -1.044684000 | -0.195441000 |
| 1  | -6.468138000 | -1.926117000 | 0.983458000  |
| 1  | -0.095083000 | 3.381352000  | 0.584230000  |

*E*-enol-imine XV

|    |              |              |              |
|----|--------------|--------------|--------------|
| 6  | -4.836086000 | -1.130199000 | 0.332739000  |
| 6  | -5.544248000 | -0.132049000 | -0.340793000 |
| 6  | -4.842114000 | 0.905530000  | -0.944534000 |
| 6  | -3.452272000 | 0.974263000  | -0.873652000 |
| 6  | -2.744929000 | -0.021822000 | -0.184186000 |
| 6  | -3.446387000 | -1.087583000 | 0.396680000  |
| 7  | -1.342670000 | -0.048530000 | -0.085867000 |
| 6  | -0.690674000 | 1.039739000  | 0.068807000  |
| 6  | 0.776968000  | 1.060208000  | 0.112999000  |
| 6  | 1.468849000  | 2.269825000  | 0.306993000  |
| 6  | 2.864093000  | 2.284200000  | 0.348580000  |
| 6  | 3.586553000  | 1.106010000  | 0.200093000  |
| 6  | 2.901145000  | -0.093051000 | 0.007937000  |
| 6  | 1.518475000  | -0.121588000 | -0.037500000 |
| 8  | -5.564341000 | -2.139211000 | 0.904616000  |
| 35 | 3.895083000  | -1.721357000 | -0.196728000 |
| 8  | 0.731610000  | 3.412172000  | 0.449666000  |
| 1  | -6.624064000 | -0.193134000 | -0.393319000 |
| 1  | -5.387600000 | 1.669533000  | -1.487302000 |
| 1  | -2.917313000 | 1.769816000  | -1.377421000 |
| 1  | -2.884176000 | -1.866772000 | 0.901320000  |
| 1  | -1.190101000 | 2.004467000  | 0.190438000  |
| 1  | 3.390901000  | 3.221879000  | 0.497988000  |
| 1  | 4.668156000  | 1.123127000  | 0.233211000  |
| 1  | 0.976213000  | -1.045500000 | -0.187891000 |
| 1  | -4.970942000 | -2.767374000 | 1.329514000  |
| 1  | 1.315319000  | 4.166586000  | 0.580760000  |

*E*-enol-imine XVI

|    |              |              |              |
|----|--------------|--------------|--------------|
| 6  | -4.832365000 | -1.122420000 | 0.349299000  |
| 6  | -5.534889000 | -0.135427000 | -0.347159000 |
| 6  | -4.828842000 | 0.888997000  | -0.974832000 |
| 6  | -3.441671000 | 0.950913000  | -0.901681000 |
| 6  | -2.740590000 | -0.036969000 | -0.188536000 |
| 6  | -3.442696000 | -1.086040000 | 0.414074000  |
| 7  | -1.337944000 | -0.060410000 | -0.092976000 |
| 6  | -0.690227000 | 1.028560000  | 0.070196000  |
| 6  | 0.777676000  | 1.054038000  | 0.114646000  |
| 6  | 1.465573000  | 2.265640000  | 0.309123000  |
| 6  | 2.860718000  | 2.284449000  | 0.351141000  |
| 6  | 3.586815000  | 1.108519000  | 0.202421000  |
| 6  | 2.905237000  | -0.092656000 | 0.009804000  |
| 6  | 1.522600000  | -0.125613000 | -0.035420000 |
| 8  | -5.460179000 | -2.162678000 | 0.981667000  |
| 35 | 3.904613000  | -1.717515000 | -0.194841000 |
| 8  | 0.724875000  | 3.406147000  | 0.451363000  |
| 1  | -6.618041000 | -0.175829000 | -0.410389000 |
| 1  | -5.371551000 | 1.642763000  | -1.534348000 |
| 1  | -2.900643000 | 1.733051000  | -1.419729000 |
| 1  | -2.904598000 | -1.864202000 | 0.940066000  |
| 1  | -1.193298000 | 1.990555000  | 0.199905000  |
| 1  | 3.384542000  | 3.223757000  | 0.500996000  |
| 1  | 4.668359000  | 1.128888000  | 0.235970000  |
| 1  | 0.982839000  | -1.051311000 | -0.184412000 |
| 1  | -6.411782000 | -2.092836000 | 0.853703000  |
| 1  | 1.306712000  | 4.161381000  | 0.585822000  |



## Z-enol-imine I

|    |              |              |              |
|----|--------------|--------------|--------------|
| 6  | 3.182195000  | -0.019281000 | -2.024965000 |
| 6  | 4.373642000  | -0.457057000 | -1.456676000 |
| 6  | 4.638238000  | -0.158065000 | -0.118753000 |
| 6  | 3.721836000  | 0.575277000  | 0.635660000  |
| 6  | 2.508568000  | 0.990409000  | 0.061267000  |
| 6  | 2.243511000  | 0.695490000  | -1.284410000 |
| 7  | 1.652475000  | 1.795866000  | 0.831128000  |
| 6  | 0.414195000  | 1.558019000  | 1.025059000  |
| 6  | -0.452226000 | 0.402199000  | 0.681795000  |
| 8  | 5.823415000  | -0.595991000 | 0.400069000  |
| 6  | -1.786729000 | 0.725900000  | 0.366519000  |
| 6  | -2.713360000 | -0.257168000 | 0.073104000  |
| 6  | -2.352138000 | -1.603395000 | 0.121437000  |
| 6  | -1.052476000 | -1.941810000 | 0.462048000  |
| 6  | -0.093222000 | -0.961910000 | 0.743902000  |
| 8  | 1.117875000  | -1.429208000 | 1.135435000  |
| 35 | -4.511839000 | 0.229494000  | -0.380158000 |
| 1  | 2.979171000  | -0.241289000 | -3.066586000 |
| 1  | 5.103813000  | -1.015963000 | -2.028035000 |
| 1  | 3.939152000  | 0.852588000  | 1.662437000  |
| 1  | 1.324578000  | 1.041295000  | -1.740002000 |
| 1  | -0.129564000 | 2.357683000  | 1.534335000  |
| 1  | 5.897650000  | -0.330203000 | 1.322819000  |
| 1  | -2.081563000 | 1.768541000  | 0.351018000  |
| 1  | -3.078164000 | -2.376131000 | -0.095815000 |
| 1  | -0.749129000 | -2.979836000 | 0.522442000  |
| 1  | 1.818566000  | -0.770095000 | 1.025076000  |

## Z-enol-imine II

|    |              |              |              |
|----|--------------|--------------|--------------|
| 6  | 3.168426000  | 0.035928000  | -2.025697000 |
| 6  | 4.352957000  | -0.429371000 | -1.456817000 |
| 6  | 4.614266000  | -0.161991000 | -0.111687000 |
| 6  | 3.703711000  | 0.566875000  | 0.654034000  |
| 6  | 2.503054000  | 1.007044000  | 0.080839000  |
| 6  | 2.238795000  | 0.745428000  | -1.274979000 |
| 7  | 1.645573000  | 1.803056000  | 0.858839000  |
| 6  | 0.410443000  | 1.556224000  | 1.057605000  |
| 6  | -0.449853000 | 0.398886000  | 0.702417000  |
| 8  | 5.755850000  | -0.575323000 | 0.514294000  |
| 6  | -1.784115000 | 0.720709000  | 0.384138000  |
| 6  | -2.703798000 | -0.262042000 | 0.069138000  |
| 6  | -2.335387000 | -1.606988000 | 0.097585000  |
| 6  | -1.036652000 | -1.944054000 | 0.442089000  |
| 6  | -0.084111000 | -0.963911000 | 0.747150000  |
| 8  | 1.124756000  | -1.433746000 | 1.140053000  |
| 35 | -4.502227000 | 0.222276000  | -0.387445000 |
| 1  | 2.969218000  | -0.162896000 | -3.072686000 |
| 1  | 5.068258000  | -0.986427000 | -2.053517000 |
| 1  | 3.937209000  | 0.806288000  | 1.684122000  |
| 1  | 1.325904000  | 1.112260000  | -1.726150000 |
| 1  | -0.136528000 | 2.347593000  | 1.576349000  |
| 1  | 6.311694000  | -1.059611000 | -0.105272000 |
| 1  | -2.083746000 | 1.762096000  | 0.382708000  |
| 1  | -3.055873000 | -2.379898000 | -0.136820000 |
| 1  | -0.728828000 | -2.981443000 | 0.489500000  |
| 1  | 1.820374000  | -0.762901000 | 1.080808000  |

## Z-enol-imine III

|    |              |              |              |
|----|--------------|--------------|--------------|
| 6  | 2.881219000  | -0.133789000 | -2.047450000 |
| 6  | 4.135778000  | -0.537645000 | -1.603433000 |
| 6  | 4.552469000  | -0.162643000 | -0.323842000 |
| 6  | 3.728202000  | 0.605077000  | 0.492577000  |
| 6  | 2.449635000  | 0.972312000  | 0.054267000  |
| 6  | 2.031016000  | 0.612415000  | -1.233372000 |
| 7  | 1.683078000  | 1.802469000  | 0.890413000  |
| 6  | 0.461160000  | 1.598375000  | 1.181746000  |
| 6  | -0.440304000 | 0.457307000  | 0.857691000  |
| 8  | 5.799340000  | -0.570002000 | 0.075752000  |
| 6  | -1.738879000 | 0.761398000  | 0.427718000  |
| 6  | -2.634278000 | -0.246911000 | 0.099648000  |
| 6  | -2.269445000 | -1.583780000 | 0.222599000  |
| 6  | -0.999126000 | -1.898534000 | 0.692832000  |
| 6  | -0.087062000 | -0.893740000 | 1.020897000  |
| 8  | 1.139332000  | -1.174886000 | 1.537967000  |
| 35 | -4.392184000 | 0.204950000  | -0.518560000 |
| 1  | 2.560148000  | -0.402099000 | -3.047988000 |
| 1  | 4.802043000  | -1.117288000 | -2.230025000 |
| 1  | 4.054488000  | 0.918618000  | 1.479042000  |
| 1  | 1.063750000  | 0.934477000  | -1.597325000 |
| 1  | -0.027593000 | 2.397910000  | 1.745172000  |
| 1  | 5.984345000  | -0.225291000 | 0.955583000  |
| 1  | -2.033446000 | 1.799998000  | 0.333910000  |
| 1  | -2.967484000 | -2.371612000 | -0.028633000 |
| 1  | -0.717414000 | -2.939801000 | 0.816935000  |
| 1  | 1.294376000  | -2.125408000 | 1.529011000  |

## Z-enol-imine IV

|    |              |              |              |
|----|--------------|--------------|--------------|
| 6  | -2.896996000 | 0.326313000  | 2.030077000  |
| 6  | -4.142541000 | -0.181372000 | 1.665704000  |
| 6  | -4.543832000 | -0.104095000 | 0.329100000  |
| 6  | -3.715995000 | 0.475607000  | -0.626338000 |
| 6  | -2.451769000 | 0.946219000  | -0.260013000 |
| 6  | -2.044977000 | 0.882840000  | 1.082236000  |
| 7  | -1.677770000 | 1.593722000  | -1.238467000 |
| 6  | -0.454726000 | 1.338101000  | -1.476717000 |
| 6  | 0.443462000  | 0.281666000  | -0.931604000 |
| 8  | -5.758010000 | -0.576577000 | -0.099853000 |
| 6  | 1.741202000  | 0.661655000  | -0.564211000 |
| 6  | 2.634266000  | -0.265531000 | -0.045808000 |
| 6  | 2.267921000  | -1.600836000 | 0.089423000  |
| 6  | 0.998126000  | -1.998931000 | -0.314415000 |
| 6  | 0.087922000  | -1.074948000 | -0.831554000 |
| 8  | -1.137405000 | -1.447146000 | -1.288189000 |
| 35 | 4.391216000  | 0.295579000  | 0.478947000  |
| 1  | -2.590073000 | 0.287629000  | 3.069434000  |
| 1  | -4.800283000 | -0.617003000 | 2.411741000  |
| 1  | -4.048169000 | 0.553098000  | -1.653527000 |
| 1  | -1.085515000 | 1.288741000  | 1.376234000  |
| 1  | 0.038392000  | 2.012344000  | -2.182288000 |
| 1  | -6.261811000 | -0.900721000 | 0.653664000  |
| 1  | 2.037778000  | 1.698302000  | -0.672533000 |
| 1  | 2.964461000  | -2.326310000 | 0.488988000  |
| 1  | 0.715546000  | -3.044493000 | -0.237464000 |
| 1  | -1.287553000 | -2.383245000 | -1.119052000 |

## Z-enol-imine V

|    |              |              |              |
|----|--------------|--------------|--------------|
| 6  | -3.436112000 | 1.518118000  | -0.299785000 |
| 6  | -4.570276000 | 0.994747000  | 0.327255000  |
| 6  | -4.739517000 | -0.383059000 | 0.378287000  |
| 6  | -3.803879000 | -1.247602000 | -0.190594000 |
| 6  | -2.653434000 | -0.719519000 | -0.794688000 |
| 6  | -2.477736000 | 0.672393000  | -0.854782000 |
| 7  | -1.752650000 | -1.596196000 | -1.423977000 |
| 6  | -0.501983000 | -1.644360000 | -1.179355000 |
| 6  | 0.345418000  | -0.964186000 | -0.166731000 |
| 6  | 1.643093000  | -0.627476000 | -0.599798000 |
| 6  | 2.548830000  | -0.020761000 | 0.250315000  |
| 6  | 2.205885000  | 0.237148000  | 1.577574000  |
| 6  | 0.945807000  | -0.118754000 | 2.030281000  |
| 6  | 0.006276000  | 0.717519000  | 1.181514000  |
| 8  | -1.157037000 | -1.083525000 | 1.771685000  |
| 35 | 4.292759000  | 0.451066000  | -0.392549000 |
| 8  | -3.315259000 | 2.878479000  | -0.336315000 |
| 1  | -5.298673000 | 1.673301000  | 0.752678000  |
| 1  | -5.622395000 | -0.793553000 | 0.854768000  |
| 1  | -3.955570000 | -2.319943000 | -0.188905000 |
| 1  | -1.601692000 | 1.081389000  | -1.347181000 |
| 1  | 0.070323000  | -2.295500000 | -1.844913000 |
| 1  | 1.925462000  | -0.846879000 | -1.622716000 |
| 1  | 2.916382000  | 0.700787000  | 2.249704000  |
| 1  | 0.659377000  | 0.053603000  | 3.060554000  |
| 1  | -1.870729000 | -1.227082000 | 1.132364000  |
| 1  | -2.496375000 | 3.125313000  | -0.779188000 |

## Z-enol-imine VI

|    |              |              |              |
|----|--------------|--------------|--------------|
| 6  | -3.466753000 | 1.492512000  | -0.337976000 |
| 6  | -4.591076000 | 0.965522000  | 0.303732000  |
| 6  | -4.740715000 | -0.416096000 | 0.389023000  |
| 6  | -3.793148000 | -1.274688000 | -0.160748000 |
| 6  | -2.650323000 | -0.738984000 | -0.780319000 |
| 6  | -2.495096000 | 0.650165000  | -0.874182000 |
| 7  | -1.740360000 | -1.617689000 | -1.391616000 |
| 6  | -0.489127000 | -1.651498000 | -1.148131000 |
| 6  | 0.357247000  | -0.951526000 | -0.148756000 |
| 6  | 1.655942000  | -0.627443000 | -0.588451000 |
| 6  | 2.563622000  | -0.006752000 | 0.249056000  |
| 6  | 2.221699000  | 0.279519000  | 1.570594000  |
| 6  | 0.960554000  | -0.062925000 | 2.030331000  |
| 6  | 0.019427000  | -0.675707000 | 1.193992000  |
| 8  | -1.145585000 | -1.025952000 | 1.792047000  |
| 35 | 4.309627000  | 0.444692000  | -0.402747000 |
| 8  | -3.259267000 | 2.836760000  | -0.469404000 |
| 1  | -5.342866000 | 1.627619000  | 0.721452000  |
| 1  | -5.616640000 | -0.827888000 | 0.876990000  |
| 1  | -3.926143000 | -2.349116000 | -0.133565000 |
| 1  | -1.635486000 | 1.080482000  | -1.371747000 |
| 1  | 0.086627000  | -2.308498000 | -1.804928000 |
| 1  | 1.937122000  | -0.867435000 | -1.606999000 |
| 1  | 2.933561000  | 0.755103000  | 2.232826000  |
| 1  | 0.674520000  | 0.132138000  | 3.056649000  |
| 1  | -1.857322000 | -1.183289000 | 1.154462000  |
| 1  | -3.982513000 | 3.321396000  | -0.057830000 |

## Z-enol-imine VII

|    |              |              |              |
|----|--------------|--------------|--------------|
| 6  | -3.164422000 | 1.649358000  | -0.134418000 |
| 6  | -4.387765000 | 1.216293000  | 0.376479000  |
| 6  | -4.729844000 | -0.128988000 | 0.257825000  |
| 6  | -3.878268000 | -1.037557000 | -0.361489000 |
| 6  | -2.634915000 | -0.605752000 | -0.838831000 |
| 6  | -2.286861000 | 0.748213000  | -0.736043000 |
| 7  | -1.819493000 | -1.527738000 | -1.517581000 |
| 6  | -0.578912000 | -1.698620000 | -1.292494000 |
| 6  | 0.312800000  | -1.108046000 | -0.254395000 |
| 6  | 1.574426000  | -0.657709000 | -0.665389000 |
| 6  | 2.457020000  | -0.087491000 | 0.241520000  |
| 6  | 2.117952000  | 0.017830000  | 1.586784000  |
| 6  | 0.887023000  | -0.467748000 | 2.015085000  |
| 6  | -0.012790000 | -1.037270000 | 1.111781000  |
| 8  | -1.197429000 | -1.570462000 | 1.511528000  |
| 35 | 4.159477000  | 0.554299000  | -0.363772000 |
| 8  | -2.868855000 | 2.983551000  | -0.017252000 |
| 1  | -5.054808000 | 1.935031000  | 0.835867000  |
| 1  | -5.686560000 | -0.468327000 | 0.639298000  |
| 1  | -4.151681000 | -2.078849000 | -0.474342000 |
| 1  | -1.342382000 | 1.095265000  | -1.142322000 |
| 1  | -0.063384000 | -2.371304000 | -1.983315000 |
| 1  | 1.849972000  | -0.742454000 | -1.710050000 |
| 1  | 2.806467000  | 0.457368000  | 2.296687000  |
| 1  | 0.627854000  | -0.413788000 | 3.068107000  |
| 1  | -1.342220000 | -1.401263000 | 2.448572000  |
| 1  | -2.010912000 | 3.162233000  | -0.416130000 |

## Z-enol-imine VIII

|    |              |              |              |
|----|--------------|--------------|--------------|
| 6  | -3.206286000 | 1.626971000  | -0.159560000 |
| 6  | -4.423116000 | 1.177071000  | 0.353114000  |
| 6  | -4.741391000 | -0.178878000 | 0.254493000  |
| 6  | -3.869406000 | -1.075390000 | -0.346808000 |
| 6  | -2.631543000 | -0.622384000 | -0.828299000 |
| 6  | -2.307994000 | 0.735555000  | -0.743995000 |
| 7  | -1.803547000 | -1.537271000 | -1.500437000 |
| 6  | -0.560784000 | -1.692367000 | -1.277142000 |
| 6  | 0.328597000  | -1.091785000 | -0.243981000 |
| 6  | 1.591432000  | -0.648868000 | -0.659789000 |
| 6  | 2.476481000  | -0.073653000 | 0.240971000  |
| 6  | 2.138656000  | 0.045623000  | 1.585272000  |
| 6  | 0.906458000  | -0.431574000 | 2.018572000  |
| 6  | 0.004401000  | -1.006630000 | 1.121358000  |
| 8  | -1.181331000 | -1.533402000 | 1.529131000  |
| 35 | 4.181500000  | 0.554689000  | -0.370652000 |
| 8  | -2.831010000 | 2.945803000  | -0.116089000 |
| 1  | -5.120433000 | 1.876377000  | 0.804415000  |
| 1  | -5.692749000 | -0.530193000 | 0.638358000  |
| 1  | -4.120664000 | -2.123571000 | -0.446301000 |
| 1  | -1.377371000 | 1.114245000  | -1.146833000 |
| 1  | -0.039278000 | -2.359913000 | -1.968585000 |
| 1  | 1.865513000  | -0.743306000 | -1.703925000 |
| 1  | 2.828694000  | 0.490454000  | 2.290335000  |
| 1  | 0.647655000  | -0.366107000 | 3.071085000  |
| 1  | -1.317993000 | -1.360816000 | 2.466661000  |
| 1  | -3.535337000 | 3.468250000  | 0.281117000  |

## Z-enol-imine IX

|    |              |              |              |
|----|--------------|--------------|--------------|
| 6  | -2.718274000 | 0.034230000  | 1.890548000  |
| 6  | -3.575521000 | -0.818757000 | 1.204014000  |
| 6  | -3.715162000 | -0.671050000 | -0.177619000 |
| 6  | -3.010487000 | 0.319934000  | -0.858033000 |
| 6  | -2.121492000 | 1.149888000  | -0.162842000 |
| 6  | -1.985202000 | 1.013817000  | 1.224320000  |
| 7  | -1.486017000 | 2.183513000  | -0.879963000 |
| 6  | -0.224566000 | 2.366290000  | -0.901336000 |
| 6  | 0.891016000  | 1.545552000  | -0.374447000 |
| 8  | -4.576468000 | -1.521593000 | -0.815932000 |
| 6  | 2.063773000  | 2.181370000  | 0.075475000  |
| 6  | 3.174939000  | 1.428591000  | 0.459052000  |
| 6  | 3.136030000  | 0.043505000  | 0.400974000  |
| 6  | 1.974359000  | -0.591693000 | -0.040964000 |
| 6  | 0.863540000  | 0.140934000  | -0.420492000 |
| 8  | 2.187351000  | 3.537991000  | 0.175473000  |
| 35 | 1.924145000  | -2.506114000 | -0.134447000 |
| 1  | -2.616884000 | -0.067344000 | 2.965272000  |
| 1  | -4.144255000 | -1.585361000 | 1.714853000  |
| 1  | -3.140145000 | 0.462896000  | -1.926163000 |
| 1  | -1.324463000 | 1.675891000  | 1.769633000  |
| 1  | 0.092965000  | 3.262317000  | -1.446571000 |
| 1  | -4.590458000 | -1.325646000 | -1.758631000 |
| 1  | 4.060004000  | 1.946550000  | 0.807475000  |
| 1  | 3.999004000  | -0.538137000 | 0.698294000  |
| 1  | -0.025735000 | -0.362763000 | -0.772365000 |
| 1  | 1.342235000  | 3.974143000  | 0.025371000  |

## Z-enol-imine X

|    |              |              |              |
|----|--------------|--------------|--------------|
| 6  | -2.751945000 | 0.061106000  | 1.884136000  |
| 6  | -3.591847000 | -0.750930000 | 1.129202000  |
| 6  | -3.676005000 | -0.539393000 | -0.248437000 |
| 6  | -2.933804000 | 0.470387000  | -0.857684000 |
| 6  | -2.063512000 | 1.259904000  | -0.093800000 |
| 6  | -1.984892000 | 1.061325000  | 1.290999000  |
| 7  | -1.389383000 | 2.319599000  | -0.727317000 |
| 6  | -0.122610000 | 2.457229000  | -0.759856000 |
| 6  | 0.961074000  | 1.539680000  | -0.329261000 |
| 8  | -4.521390000 | -1.349762000 | -0.958524000 |
| 6  | 2.204580000  | 2.091176000  | 0.034516000  |
| 6  | 3.278335000  | 1.265206000  | 0.367217000  |
| 6  | 3.140122000  | -0.117537000 | 0.330368000  |
| 6  | 1.916015000  | -0.667568000 | -0.040747000 |
| 6  | 0.837827000  | 0.142900000  | -0.363356000 |
| 8  | 2.306751000  | 3.453527000  | 0.061622000  |
| 35 | 1.724274000  | -2.573705000 | -0.116373000 |
| 1  | -2.692473000 | -0.089071000 | 2.956469000  |
| 1  | -4.188047000 | -1.532072000 | 1.583502000  |
| 1  | -3.019931000 | 0.659103000  | -1.923278000 |
| 1  | -1.340140000 | 1.693971000  | 1.888150000  |
| 1  | 0.237672000  | 3.389120000  | -1.195283000 |
| 1  | -4.496100000 | -1.108102000 | -1.890266000 |
| 1  | 4.228767000  | 1.703378000  | 0.656673000  |
| 1  | 3.976237000  | -0.755660000 | 0.585214000  |
| 1  | -0.102082000 | -0.301884000 | -0.656508000 |
| 1  | 3.209290000  | 3.712676000  | 0.275047000  |

## Z-enol-imine XI

|    |              |              |              |
|----|--------------|--------------|--------------|
| 6  | -2.773331000 | 0.116211000  | 1.875843000  |
| 6  | -3.592300000 | -0.710443000 | 1.108682000  |
| 6  | -3.646347000 | -0.517920000 | -0.273841000 |
| 6  | -2.895848000 | 0.486470000  | -0.880478000 |
| 6  | -2.050830000 | 1.287832000  | -0.106237000 |
| 6  | -2.000950000 | 1.109981000  | 1.285746000  |
| 7  | -1.363433000 | 2.344560000  | -0.729872000 |
| 6  | -0.095762000 | 2.467500000  | -0.763103000 |
| 6  | 0.976316000  | 1.535655000  | -0.333583000 |
| 8  | -4.434317000 | -1.283870000 | -1.091523000 |
| 6  | 2.225574000  | 2.071797000  | 0.033858000  |
| 6  | 3.287433000  | 1.232813000  | 0.371750000  |
| 6  | 3.131411000  | -0.148161000 | 0.337466000  |
| 6  | 1.901550000  | -0.682823000 | -0.036383000 |
| 6  | 0.834916000  | 0.140566000  | -0.365191000 |
| 8  | 2.345476000  | 3.432789000  | 0.059561000  |
| 35 | 1.685839000  | -2.586958000 | -0.106861000 |
| 1  | -2.737706000 | -0.021176000 | 2.950880000  |
| 1  | -4.188665000 | -1.486254000 | 1.578548000  |
| 1  | -2.969263000 | 0.641205000  | -1.949610000 |
| 1  | -1.372203000 | 1.754523000  | 1.887188000  |
| 1  | 0.275687000  | 3.397351000  | -1.193341000 |
| 1  | -4.911948000 | -1.932732000 | -0.564505000 |
| 1  | 4.242502000  | 1.659288000  | 0.663434000  |
| 1  | 3.958362000  | -0.796479000 | 0.596414000  |
| 1  | -0.108858000 | -0.292453000 | -0.663482000 |
| 1  | 3.251486000  | 3.680130000  | 0.272218000  |

## Z-enol-imine XII

|    |              |              |              |
|----|--------------|--------------|--------------|
| 6  | -2.733591000 | 0.093249000  | 1.883093000  |
| 6  | -3.566735000 | -0.778763000 | 1.184990000  |
| 6  | -3.676895000 | -0.651312000 | -0.201700000 |
| 6  | -2.967913000 | 0.337265000  | -0.880449000 |
| 6  | -2.107272000 | 1.182929000  | -0.175312000 |
| 6  | -1.999109000 | 1.069216000  | 1.219345000  |
| 7  | -1.460103000 | 2.215358000  | -0.883836000 |
| 6  | -0.196983000 | 2.381314000  | -0.905850000 |
| 6  | 0.906425000  | 1.543542000  | -0.379780000 |
| 8  | -4.481503000 | -1.464597000 | -0.952947000 |
| 6  | 2.086420000  | 2.162111000  | 0.075586000  |
| 6  | 3.184073000  | 1.393086000  | 0.465525000  |
| 6  | 3.124200000  | 0.008581000  | 0.409442000  |
| 6  | 1.955206000  | -0.609206000 | -0.037263000 |
| 6  | 0.857635000  | 0.139509000  | -0.424271000 |
| 8  | 2.230002000  | 3.516780000  | 0.175725000  |
| 35 | 1.875769000  | -2.523189000 | -0.126274000 |
| 1  | -2.655572000 | 0.005386000  | 2.960910000  |
| 1  | -4.131775000 | -1.541304000 | 1.711867000  |
| 1  | -3.085030000 | 0.444490000  | -1.951421000 |
| 1  | -1.356863000 | 1.746206000  | 1.768424000  |
| 1  | 0.132409000  | 3.276076000  | -1.446176000 |
| 1  | -4.924177000 | -2.100537000 | -0.381428000 |
| 1  | 4.075289000  | 1.898024000  | 0.817360000  |
| 1  | 3.976739000  | -0.585737000 | 0.711785000  |
| 1  | -0.036612000 | -0.350852000 | -0.782265000 |
| 1  | 1.393617000  | 3.965771000  | 0.015025000  |

## Z-enol-imine XIII

|    |              |              |              |
|----|--------------|--------------|--------------|
| 6  | -2.988621000 | -0.604414000 | 1.174462000  |
| 6  | -3.580542000 | -1.515738000 | 0.298324000  |
| 6  | -3.532865000 | -1.265826000 | -1.069340000 |
| 6  | -2.913973000 | -0.124652000 | -1.574083000 |
| 6  | -2.291646000 | 0.767413000  | -0.693325000 |
| 6  | -2.342355000 | 0.530455000  | 0.687119000  |
| 7  | -1.727320000 | 1.949407000  | -1.214232000 |
| 6  | -0.521444000 | 2.313280000  | -1.020099000 |
| 6  | 0.617533000  | 1.615427000  | -0.377629000 |
| 6  | 1.592898000  | 2.367641000  | 0.304375000  |
| 6  | 2.734314000  | 1.748621000  | 0.816708000  |
| 6  | 2.920815000  | 0.383463000  | 0.658584000  |
| 6  | 1.955841000  | -0.367228000 | -0.014961000 |
| 6  | 0.816955000  | 0.231581000  | -0.524703000 |
| 8  | -3.071513000 | -0.876185000 | 2.513443000  |
| 8  | 1.486595000  | 3.712730000  | 0.517468000  |
| 35 | 2.220986000  | -2.252064000 | -0.244951000 |
| 1  | -4.074736000 | -2.391344000 | 0.699811000  |
| 1  | -3.999966000 | -1.965318000 | -1.753436000 |
| 1  | -2.902439000 | 0.084708000  | -2.636343000 |
| 1  | -1.885662000 | 1.237278000  | 1.372485000  |
| 1  | -0.271661000 | 3.293278000  | -1.442566000 |
| 1  | 3.463486000  | 2.353000000  | 1.342138000  |
| 1  | 3.806984000  | -0.094344000 | 1.055798000  |
| 1  | 0.082648000  | -0.357968000 | -1.055741000 |
| 1  | -2.610249000 | -0.195865000 | 3.014921000  |
| 1  | 0.626202000  | 4.040462000  | 0.235952000  |

## Z-enol-imine XIV

|    |              |              |              |
|----|--------------|--------------|--------------|
| 6  | -3.014862000 | -0.570427000 | 1.161617000  |
| 6  | -3.574327000 | -1.497696000 | 0.280568000  |
| 6  | -3.491654000 | -1.266015000 | -1.091874000 |
| 6  | -2.868528000 | -0.127978000 | -1.590174000 |
| 6  | -2.277846000 | 0.780420000  | -0.699328000 |
| 6  | -2.362990000 | 0.562681000  | 0.678939000  |
| 7  | -1.708751000 | 1.960843000  | -1.218030000 |
| 6  | -0.502614000 | 2.319601000  | -1.017204000 |
| 6  | 0.629409000  | 1.615071000  | -0.370363000 |
| 6  | 1.608150000  | 2.362209000  | 0.312316000  |
| 6  | 2.747046000  | 1.737937000  | 0.823502000  |
| 6  | 2.926968000  | 0.371894000  | 0.665618000  |
| 6  | 1.957074000  | -0.373785000 | -0.005826000 |
| 6  | 0.821020000  | 0.230088000  | -0.515366000 |
| 8  | -3.070216000 | -0.719395000 | 2.521334000  |
| 8  | 1.509051000  | 3.708062000  | 0.523428000  |
| 35 | 2.211626000  | -2.261143000 | -0.233971000 |
| 1  | -4.078529000 | -2.380364000 | 0.661274000  |
| 1  | -3.934201000 | -1.978591000 | -1.778720000 |
| 1  | -2.827954000 | 0.068959000  | -2.654086000 |
| 1  | -1.937269000 | 1.267109000  | 1.382228000  |
| 1  | -0.245821000 | 3.299494000  | -1.435089000 |
| 1  | 3.478345000  | 2.338622000  | 1.350135000  |
| 1  | 3.810512000  | -0.110311000 | 1.063297000  |
| 1  | 0.083783000  | -0.356409000 | -1.045443000 |
| 1  | -3.522662000 | -1.540736000 | 2.739889000  |
| 1  | 0.636402000  | 4.032976000  | 0.279068000  |

## Z-enol-imine XV

|    |              |              |              |
|----|--------------|--------------|--------------|
| 6  | -3.064286000 | -0.496350000 | 1.125182000  |
| 6  | -3.618326000 | -1.364045000 | 0.183076000  |
| 6  | -3.482221000 | -1.064547000 | -1.169070000 |
| 6  | -2.811729000 | 0.080200000  | -1.593304000 |
| 6  | -2.228372000 | 0.928978000  | -0.644220000 |
| 6  | -2.369329000 | 0.642447000  | 0.720688000  |
| 7  | -1.615970000 | 2.121737000  | -1.070251000 |
| 6  | -0.392491000 | 2.420437000  | -0.876493000 |
| 6  | 0.723404000  | 1.612289000  | -0.324763000 |
| 6  | 1.802058000  | 2.283192000  | 0.282986000  |
| 6  | 2.909912000  | 1.573766000  | 0.746560000  |
| 6  | 2.971005000  | 0.192512000  | 0.602163000  |
| 6  | 1.912546000  | -0.474216000 | -0.009270000 |
| 6  | 0.800375000  | 0.218480000  | -0.464899000 |
| 8  | -3.231346000 | -0.813452000 | 2.447318000  |
| 35 | 2.004087000  | -2.376123000 | -0.231816000 |
| 8  | 1.709284000  | 3.640684000  | 0.411532000  |
| 1  | -4.152263000 | -2.243140000 | 0.520881000  |
| 1  | -3.919446000 | -1.728811000 | -1.906221000 |
| 1  | -2.730896000 | 0.325417000  | -2.644952000 |
| 1  | -1.943253000 | 1.317442000  | 1.456377000  |
| 1  | -0.099668000 | 3.425273000  | -1.180290000 |
| 1  | 3.730280000  | 2.101791000  | 1.223292000  |
| 1  | 3.833496000  | -0.354679000 | 0.959705000  |
| 1  | -0.007957000 | -0.313448000 | -0.945900000 |
| 1  | -2.805246000 | -0.147998000 | 2.997425000  |
| 1  | 2.524933000  | 3.993573000  | 0.782395000  |

## Z-enol-imine XVI

|    |              |              |              |
|----|--------------|--------------|--------------|
| 6  | -3.052666000 | -0.483262000 | 1.127847000  |
| 6  | -3.615262000 | -1.347215000 | 0.186548000  |
| 6  | -3.487470000 | -1.047522000 | -1.169437000 |
| 6  | -2.815625000 | 0.093483000  | -1.591690000 |
| 6  | -2.223225000 | 0.938484000  | -0.640205000 |
| 6  | -2.355818000 | 0.653214000  | 0.722638000  |
| 7  | -1.608933000 | 2.127824000  | -1.071959000 |
| 6  | -0.384990000 | 2.424496000  | -0.878966000 |
| 6  | 0.727500000  | 1.613828000  | -0.324426000 |
| 6  | 1.801322000  | 2.280683000  | 0.295689000  |
| 6  | 2.903890000  | 1.567639000  | 0.766297000  |
| 6  | 2.964988000  | 0.187097000  | 0.615607000  |
| 6  | 1.911851000  | -0.474780000 | -0.009650000 |
| 6  | 0.804630000  | 0.221114000  | -0.471720000 |
| 8  | -3.149042000 | -0.702500000 | 2.476867000  |
| 35 | 2.003790000  | -2.376218000 | -0.242495000 |
| 8  | 1.709136000  | 3.637488000  | 0.428187000  |
| 1  | -4.155593000 | -2.232180000 | 0.507853000  |
| 1  | -3.931972000 | -1.709586000 | -1.904112000 |
| 1  | -2.738698000 | 0.341601000  | -2.642927000 |
| 1  | -1.930122000 | 1.310288000  | 1.470512000  |
| 1  | -0.089713000 | 3.428125000  | -1.184497000 |
| 1  | 3.719920000  | 2.092302000  | 1.254016000  |
| 1  | 3.823076000  | -0.362919000 | 0.979275000  |
| 1  | -0.000181000 | -0.307602000 | -0.961934000 |
| 1  | -3.637205000 | -1.516687000 | 2.637318000  |
| 1  | 2.514861000  | 3.986058000  | 0.823889000  |

keto-amine form I of the *E*-enol-imine isomer

|    |              |              |              |
|----|--------------|--------------|--------------|
| 6  | 5.339793000  | 0.997910000  | -0.000554000 |
| 6  | 5.756894000  | -0.327304000 | -0.000244000 |
| 6  | 4.795122000  | -1.340572000 | 0.000180000  |
| 6  | 3.435501000  | -1.033461000 | 0.000292000  |
| 6  | 3.030325000  | 0.307272000  | -0.000067000 |
| 6  | 3.987289000  | 1.327133000  | -0.000477000 |
| 7  | 1.677738000  | 0.691337000  | -0.000010000 |
| 6  | 0.597383000  | -0.082844000 | -0.000121000 |
| 6  | -0.700660000 | 0.433508000  | 0.000009000  |
| 6  | -1.812129000 | -0.463860000 | -0.000115000 |
| 6  | -3.083547000 | 0.024606000  | 0.000000000  |
| 6  | -3.326452000 | 1.429051000  | 0.000241000  |
| 6  | -2.291152000 | 2.319714000  | 0.000358000  |
| 6  | -0.914135000 | 1.885099000  | 0.000253000  |
| 8  | 0.046569000  | 2.698966000  | 0.000353000  |
| 35 | -4.585356000 | -1.169069000 | -0.000149000 |
| 8  | 5.250111000  | -2.628285000 | 0.000523000  |
| 1  | 6.079321000  | 1.790000000  | -0.000879000 |
| 1  | 6.805680000  | -0.594966000 | -0.000311000 |
| 1  | 2.711278000  | -1.840097000 | 0.000705000  |
| 1  | 3.668448000  | 2.362592000  | -0.000752000 |
| 1  | 1.420421000  | 1.701870000  | 0.000127000  |
| 1  | 0.739727000  | -1.158696000 | -0.000330000 |
| 1  | -1.629709000 | -1.532751000 | -0.000299000 |
| 1  | -4.350207000 | 1.784393000  | 0.000324000  |
| 1  | -2.471315000 | 3.388009000  | 0.000536000  |
| 1  | 4.510807000  | -3.245242000 | 0.000604000  |

keto-amine form II of the *E*-enol-imine isomer

|    |              |              |              |
|----|--------------|--------------|--------------|
| 6  | 5.335344000  | 0.999507000  | -0.015816000 |
| 6  | 5.748465000  | -0.330698000 | -0.007200000 |
| 6  | 4.784233000  | -1.341129000 | 0.004960000  |
| 6  | 3.425999000  | -1.031096000 | 0.008331000  |
| 6  | 3.026604000  | 0.307049000  | -0.001419000 |
| 6  | 3.986130000  | 1.329006000  | -0.013159000 |
| 7  | 1.674862000  | 0.694443000  | 0.000468000  |
| 6  | 0.595413000  | -0.081531000 | -0.002467000 |
| 6  | -0.702718000 | 0.434071000  | 0.000706000  |
| 6  | -1.812979000 | -0.465076000 | -0.002771000 |
| 6  | -3.084994000 | 0.021716000  | 0.000023000  |
| 6  | -3.329955000 | 1.425760000  | 0.006233000  |
| 6  | -2.296049000 | 2.318021000  | 0.009471000  |
| 6  | -0.918298000 | 1.885462000  | 0.007010000  |
| 8  | 0.040739000  | 2.701344000  | 0.009582000  |
| 35 | -4.585543000 | -1.173739000 | -0.004218000 |
| 8  | 5.108402000  | -2.668369000 | 0.014656000  |
| 1  | 6.077652000  | 1.788896000  | -0.025010000 |
| 1  | 6.804423000  | -0.580847000 | -0.009419000 |
| 1  | 2.719360000  | -1.849882000 | 0.019614000  |
| 1  | 3.668619000  | 2.364824000  | -0.020560000 |
| 1  | 1.417787000  | 1.704406000  | 0.004287000  |
| 1  | 0.740983000  | -1.156794000 | -0.008075000 |
| 1  | -1.628604000 | -1.533558000 | -0.007512000 |
| 1  | -4.354267000 | 1.779560000  | 0.008243000  |
| 1  | -2.477933000 | 3.386031000  | 0.014074000  |
| 1  | 6.065657000  | -2.773037000 | 0.011418000  |

keto-amine form III of the *E*-enol-imine isomer

|    |              |              |              |
|----|--------------|--------------|--------------|
| 6  | -4.888758000 | -1.205155000 | -0.127627000 |
| 6  | -5.619050000 | -0.049695000 | 0.156837000  |
| 6  | -4.935527000 | 1.135770000  | 0.396405000  |
| 6  | -3.543670000 | 1.198981000  | 0.361679000  |
| 6  | -2.822507000 | 0.040394000  | 0.063878000  |
| 6  | -3.496969000 | -1.163045000 | -0.179118000 |
| 7  | -1.412281000 | 0.019978000  | 0.004251000  |
| 6  | -0.585481000 | 1.079856000  | -0.046515000 |
| 6  | 0.793531000  | 1.055939000  | -0.057179000 |
| 6  | 1.463118000  | 2.380726000  | -0.154282000 |
| 6  | 2.925942000  | 2.339586000  | -0.167774000 |
| 6  | 3.618218000  | 1.174988000  | -0.099060000 |
| 6  | 2.930489000  | -0.082758000 | -0.003592000 |
| 6  | 1.575830000  | -0.145986000 | 0.018457000  |
| 8  | -5.593692000 | -2.351791000 | -0.355575000 |
| 8  | 0.838641000  | 3.443610000  | -0.220303000 |
| 35 | 3.983276000  | -1.681849000 | 0.100747000  |
| 1  | -6.699670000 | -0.100617000 | 0.189780000  |
| 1  | -5.496037000 | 2.034176000  | 0.627153000  |
| 1  | -3.042242000 | 2.131421000  | 0.580958000  |
| 1  | -2.934757000 | -2.061597000 | -0.418989000 |
| 1  | -0.996180000 | -0.900781000 | -0.018371000 |
| 1  | -1.047911000 | 2.058624000  | -0.096522000 |
| 1  | 3.436168000  | 3.292904000  | -0.238432000 |
| 1  | 4.701835000  | 1.176429000  | -0.112905000 |
| 1  | 1.094226000  | -1.114199000 | 0.102656000  |
| 1  | -4.994729000 | -3.083633000 | -0.536837000 |

*E* keto-amine form IV of the *E*-enol-imine isomer

|    |              |              |              |
|----|--------------|--------------|--------------|
| 6  | -4.874451000 | -1.222675000 | -0.082734000 |
| 6  | -5.616443000 | -0.054371000 | 0.100682000  |
| 6  | -4.943504000 | 1.155016000  | 0.255309000  |
| 6  | -3.554902000 | 1.223844000  | 0.232311000  |
| 6  | -2.822436000 | 0.046194000  | 0.037937000  |
| 6  | -3.483204000 | -1.174821000 | -0.117387000 |
| 7  | -1.412134000 | 0.027675000  | 0.000289000  |
| 6  | -0.581476000 | 1.084632000  | -0.031602000 |
| 6  | 0.797600000  | 1.057364000  | -0.038205000 |
| 6  | 1.469312000  | 2.383232000  | -0.099111000 |
| 6  | 2.931895000  | 2.340563000  | -0.105563000 |
| 6  | 3.622180000  | 1.173534000  | -0.061295000 |
| 6  | 2.932530000  | -0.085304000 | -0.001988000 |
| 6  | 1.577645000  | -0.147386000 | 0.010186000  |
| 8  | -5.451260000 | -2.450208000 | -0.239659000 |
| 8  | 0.846329000  | 3.448510000  | -0.141907000 |
| 35 | 3.983180000  | -1.687656000 | 0.064901000  |
| 1  | -6.700576000 | -0.089826000 | 0.125880000  |
| 1  | -5.513683000 | 2.064322000  | 0.405350000  |
| 1  | -3.064135000 | 2.176301000  | 0.375271000  |
| 1  | -2.932885000 | -2.096126000 | -0.272582000 |
| 1  | -0.999669000 | -0.895048000 | -0.016812000 |
| 1  | -1.037950000 | 2.066664000  | -0.063705000 |
| 1  | 3.443793000  | 3.294592000  | -0.149574000 |
| 1  | 4.705868000  | 1.173792000  | -0.068648000 |
| 1  | 1.094194000  | -1.116864000 | 0.062272000  |
| 1  | -6.410370000 | -2.368918000 | -0.209704000 |

keto-amine form V of the *E*-enol-imine isomer

|    |              |              |              |
|----|--------------|--------------|--------------|
| 6  | 5.325486000  | 0.147261000  | -0.058418000 |
| 6  | 5.598714000  | -1.220767000 | 0.010499000  |
| 6  | 4.539421000  | -2.116954000 | 0.088367000  |
| 6  | 3.215654000  | -1.682521000 | 0.097966000  |
| 6  | 2.951465000  | -0.311615000 | 0.023422000  |
| 6  | 4.009486000  | 0.603038000  | -0.053426000 |
| 7  | 1.651363000  | 0.225450000  | 0.024460000  |
| 6  | 0.491818000  | -0.422841000 | 0.001208000  |
| 6  | -0.737663000 | 0.242051000  | 0.012993000  |
| 6  | -1.947039000 | -0.517608000 | -0.014355000 |
| 6  | -3.152211000 | 0.117770000  | -0.003457000 |
| 6  | -3.227173000 | 1.539909000  | 0.034917000  |
| 6  | -2.093778000 | 2.301856000  | 0.060636000  |
| 6  | -0.778874000 | 1.707639000  | 0.050995000  |
| 8  | 0.271585000  | 2.404192000  | 0.072276000  |
| 35 | -4.785367000 | -0.888111000 | -0.038480000 |
| 8  | 6.391433000  | 0.995981000  | -0.131839000 |
| 1  | 6.627782000  | -1.556389000 | 0.004889000  |
| 1  | 4.746768000  | -3.179175000 | 0.146912000  |
| 1  | 2.416333000  | -2.407591000 | 0.171877000  |
| 1  | 3.794967000  | 1.665774000  | -0.111509000 |
| 1  | 1.504093000  | 1.258932000  | 0.045199000  |
| 1  | 0.513694000  | -1.507301000 | -0.032006000 |
| 1  | -1.891743000 | -1.600177000 | -0.042886000 |
| 1  | -4.201570000 | 2.013849000  | 0.043157000  |
| 1  | -2.146719000 | 3.383567000  | 0.089278000  |
| 1  | 6.088743000  | 1.909564000  | -0.170913000 |

keto-amine form VI of the *E*-enol-imine isomer

|    |              |              |              |
|----|--------------|--------------|--------------|
| 6  | 5.321986000  | 0.140850000  | -0.124569000 |
| 6  | 5.584524000  | -1.222235000 | 0.030041000  |
| 6  | 4.518828000  | -2.103228000 | 0.198304000  |
| 6  | 3.203845000  | -1.652834000 | 0.212437000  |
| 6  | 2.951744000  | -0.284390000 | 0.045006000  |
| 6  | 4.011098000  | 0.611172000  | -0.119331000 |
| 7  | 1.653088000  | 0.257407000  | 0.045205000  |
| 6  | 0.495582000  | -0.394591000 | -0.000539000 |
| 6  | -0.738791000 | 0.258826000  | 0.025023000  |
| 6  | -1.941494000 | -0.510403000 | -0.032442000 |
| 6  | -3.151980000 | 0.113631000  | -0.007386000 |
| 6  | -3.240378000 | 1.533700000  | 0.075267000  |
| 6  | -2.114561000 | 2.304568000  | 0.129182000  |
| 6  | -0.793130000 | 1.722684000  | 0.106500000  |
| 8  | 0.249821000  | 2.426502000  | 0.150822000  |
| 35 | -4.776182000 | -0.905131000 | -0.080843000 |
| 8  | 6.308641000  | 1.069147000  | -0.289925000 |
| 1  | 6.605935000  | -1.588621000 | 0.025031000  |
| 1  | 4.719473000  | -3.160186000 | 0.329502000  |
| 1  | 2.399402000  | -2.358507000 | 0.370265000  |
| 1  | 3.827227000  | 1.670907000  | -0.248865000 |
| 1  | 1.508586000  | 1.289235000  | 0.086368000  |
| 1  | 0.525514000  | -1.477284000 | -0.068689000 |
| 1  | -1.876424000 | -1.591081000 | -0.094098000 |
| 1  | -4.219312000 | 1.997953000  | 0.094069000  |
| 1  | -2.177256000 | 3.384390000  | 0.190693000  |
| 1  | 7.170275000  | 0.639211000  | -0.283359000 |

keto-amine form VII of the *E*-enol-imine isomer

|    |              |              |              |
|----|--------------|--------------|--------------|
| 6  | -4.627298000 | -2.155123000 | -0.196760000 |
| 6  | -5.520602000 | -1.104076000 | -0.034882000 |
| 6  | -5.019541000 | 0.189937000  | 0.128086000  |
| 6  | -3.645808000 | 0.430581000  | 0.132109000  |
| 6  | -2.760042000 | -0.637908000 | -0.043324000 |
| 6  | -3.252238000 | -1.936660000 | -0.204742000 |
| 7  | -1.360804000 | -0.456177000 | -0.054337000 |
| 6  | -0.686758000 | 0.706439000  | -0.071101000 |
| 6  | 0.681374000  | 0.881443000  | -0.055841000 |
| 6  | 1.147525000  | 2.293289000  | -0.100484000 |
| 6  | 2.599241000  | 2.470257000  | -0.087828000 |
| 6  | 3.455357000  | 1.418916000  | -0.038222000 |
| 6  | 2.961720000  | 0.070716000  | 0.007114000  |
| 6  | 1.631165000  | -0.193887000 | -0.000366000 |
| 8  | 0.371640000  | 3.253556000  | -0.145059000 |
| 35 | 4.241353000  | -1.354819000 | 0.083551000  |
| 8  | -5.929494000 | 1.192371000  | 0.291855000  |
| 1  | -5.005503000 | -3.162768000 | -0.323160000 |
| 1  | -6.591363000 | -1.261313000 | -0.029664000 |
| 1  | -3.283572000 | 1.440554000  | 0.281834000  |
| 1  | -2.566434000 | -2.765436000 | -0.342668000 |
| 1  | -0.824521000 | -1.313037000 | -0.065475000 |
| 1  | -1.275997000 | 1.614796000  | -0.109182000 |
| 1  | 2.963486000  | 3.490224000  | -0.121022000 |
| 1  | 4.526691000  | 1.581413000  | -0.030725000 |
| 1  | 1.296170000  | -1.224706000 | 0.040402000  |
| 1  | -5.482417000 | 2.041229000  | 0.378822000  |

keto-amine form VIII of the *E*-enol-imine isomer

|    |              |              |              |
|----|--------------|--------------|--------------|
| 6  | -4.608463000 | -2.151836000 | -0.214610000 |
| 6  | -5.508237000 | -1.103783000 | -0.040195000 |
| 6  | -5.014254000 | 0.190895000  | 0.137072000  |
| 6  | -3.642548000 | 0.440488000  | 0.141617000  |
| 6  | -2.754564000 | -0.619231000 | -0.045740000 |
| 6  | -3.238484000 | -1.923165000 | -0.221247000 |
| 7  | -1.356547000 | -0.433277000 | -0.058471000 |
| 6  | -0.683349000 | 0.730989000  | -0.071188000 |
| 6  | 0.685837000  | 0.898122000  | -0.057105000 |
| 6  | 1.165233000  | 2.305686000  | -0.105419000 |
| 6  | 2.619297000  | 2.469559000  | -0.090488000 |
| 6  | 3.466228000  | 1.411314000  | -0.038762000 |
| 6  | 2.959863000  | 0.067692000  | 0.007939000  |
| 6  | 1.627198000  | -0.185021000 | 0.000145000  |
| 8  | 0.399677000  | 3.272742000  | -0.155585000 |
| 35 | 4.226570000  | -1.369629000 | 0.088508000  |
| 8  | -5.828918000 | 1.269374000  | 0.322366000  |
| 1  | -4.982034000 | -3.159788000 | -0.351548000 |
| 1  | -6.577385000 | -1.288340000 | -0.038373000 |
| 1  | -3.309045000 | 1.456625000  | 0.300988000  |
| 1  | -2.547115000 | -2.745646000 | -0.368528000 |
| 1  | -0.817734000 | -1.288212000 | -0.078709000 |
| 1  | -1.273660000 | 1.639046000  | -0.104925000 |
| 1  | 2.991978000  | 3.486454000  | -0.124756000 |
| 1  | 4.538997000  | 1.564100000  | -0.030351000 |
| 1  | 1.284229000  | -1.213111000 | 0.044176000  |
| 1  | -6.750972000 | 0.991638000  | 0.317184000  |

keto-amine form I of the *Z*-enol-imine isomer

|    |              |              |              |
|----|--------------|--------------|--------------|
| 6  | 4.076161000  | -0.387642000 | -1.166882000 |
| 6  | 3.972915000  | -1.173458000 | -0.026765000 |
| 6  | 3.048186000  | -0.826267000 | 0.962855000  |
| 6  | 2.241358000  | 0.300296000  | 0.811349000  |
| 6  | 2.341670000  | 1.066403000  | -0.353040000 |
| 6  | 3.262686000  | 0.731546000  | -1.345105000 |
| 7  | 1.564330000  | 2.251103000  | -0.504902000 |
| 6  | 0.261028000  | 2.488097000  | -0.242829000 |
| 6  | -0.814650000 | 1.648273000  | -0.029439000 |
| 6  | -0.824345000 | 0.221183000  | -0.214062000 |
| 6  | -1.981820000 | -0.474260000 | -0.084203000 |
| 6  | -3.220739000 | 0.173670000  | 0.241526000  |
| 6  | -3.269473000 | 1.516965000  | 0.421644000  |
| 6  | -2.079162000 | 2.359878000  | 0.321084000  |
| 8  | -2.129537000 | 3.577645000  | 0.523020000  |
| 35 | -2.010332000 | -2.373658000 | -0.362247000 |
| 8  | 2.993301000  | -1.619464000 | 2.070695000  |
| 1  | 4.790996000  | -0.655291000 | -1.936135000 |
| 1  | 4.591082000  | -2.050790000 | 0.115456000  |
| 1  | 1.543515000  | 0.587921000  | 1.589841000  |
| 1  | 3.330692000  | 1.328504000  | -2.246812000 |
| 1  | 2.094506000  | 3.061748000  | -0.791198000 |
| 1  | 0.011165000  | 3.545922000  | -0.214303000 |
| 1  | 0.083497000  | -0.295880000 | -0.488533000 |
| 1  | -4.116896000 | -0.428489000 | 0.335889000  |
| 1  | -4.198233000 | 2.019565000  | 0.664373000  |
| 1  | 2.288002000  | -1.326443000 | 2.657862000  |

keto-amine form II of the *Z*-enol-imine isomer

|    |              |              |              |
|----|--------------|--------------|--------------|
| 6  | 4.029002000  | -0.354896000 | -1.219051000 |
| 6  | 3.966598000  | -1.136980000 | -0.069302000 |
| 6  | 3.079159000  | -0.787158000 | 0.952415000  |
| 6  | 2.261846000  | 0.335027000  | 0.824393000  |
| 6  | 2.322907000  | 1.095797000  | -0.341636000 |
| 6  | 3.210505000  | 0.760863000  | -1.368163000 |
| 7  | 1.535249000  | 2.276615000  | -0.473521000 |
| 6  | 0.227850000  | 2.495327000  | -0.213677000 |
| 6  | -0.839018000 | 1.642838000  | -0.011504000 |
| 6  | -0.828314000 | 0.214620000  | -0.187596000 |
| 6  | -1.979682000 | -0.493305000 | -0.076927000 |
| 6  | -3.231319000 | 0.140747000  | 0.225994000  |
| 6  | -3.298884000 | 1.483732000  | 0.402091000  |
| 6  | -2.117574000 | 2.340624000  | 0.316768000  |
| 8  | -2.186696000 | 3.558943000  | 0.510032000  |
| 35 | -1.981469000 | -2.394384000 | -0.346567000 |
| 8  | 2.974451000  | -1.494514000 | -2.13824000  |
| 1  | 4.716071000  | -0.625903000 | -2.012005000 |
| 1  | 4.601924000  | -2.010657000 | 0.035317000  |
| 1  | 1.595418000  | 0.602343000  | 1.634112000  |
| 1  | 3.244486000  | 1.356129000  | -2.272773000 |
| 1  | 2.056118000  | 3.095865000  | -0.752051000 |
| 1  | -0.035000000 | 3.549904000  | -0.181575000 |
| 1  | 0.091465000  | -0.293917000 | -0.435977000 |
| 1  | -4.121605000 | -0.471823000 | 0.308334000  |
| 1  | -4.237088000 | 1.975695000  | 0.629826000  |
| 1  | 3.572377000  | -2.249345000 | 2.097605000  |

keto-amine form III of the *Z*-enol-imine isomer

|    |              |              |              |
|----|--------------|--------------|--------------|
| 6  | 4.964962000  | -0.029241000 | 0.063259000  |
| 6  | 4.770220000  | 0.960850000  | -0.901547000 |
| 6  | 3.522045000  | 1.090208000  | -1.498134000 |
| 6  | 2.464079000  | 0.252561000  | -1.154091000 |
| 6  | 2.670571000  | -0.729698000 | -0.189210000 |
| 6  | 3.920025000  | -0.878650000 | 0.418590000  |
| 7  | 1.665929000  | -1.682928000 | 0.134028000  |
| 6  | 0.319178000  | -1.603703000 | 0.137026000  |
| 6  | -0.554376000 | -0.533681000 | 0.262535000  |
| 6  | -0.160839000 | 0.809644000  | 0.745699000  |
| 6  | -1.228207000 | 1.805010000  | 0.772214000  |
| 6  | -2.517006000 | 1.500972000  | 0.469926000  |
| 6  | -2.879321000 | 0.165836000  | 0.097668000  |
| 6  | -1.945880000 | -0.813484000 | 0.006455000  |
| 8  | 6.206360000  | -0.118307000 | 0.631029000  |
| 8  | 0.981553000  | 1.067587000  | 1.142648000  |
| 35 | -4.725281000 | -0.206689000 | -0.272184000 |
| 1  | 5.594230000  | 1.612857000  | -1.162381000 |
| 1  | 3.367597000  | 1.858726000  | -2.246485000 |
| 1  | 1.499859000  | 0.355128000  | -1.632511000 |
| 1  | 4.062760000  | -1.634014000 | 1.185925000  |
| 1  | 2.021837000  | -2.625583000 | 0.207186000  |
| 1  | -0.141258000 | -2.584137000 | 0.036217000  |
| 1  | -0.943380000 | 2.805752000  | 1.075123000  |
| 1  | -3.288732000 | 2.260165000  | 0.518960000  |
| 1  | -2.232581000 | -1.817630000 | -0.285632000 |
| 1  | 6.206981000  | -0.790650000 | 1.320078000  |

keto-amine form IV of the *Z*-enol-imine isomer

|    |              |              |              |
|----|--------------|--------------|--------------|
| 6  | 4.988295000  | -0.075121000 | 0.048128000  |
| 6  | 4.787149000  | 0.956359000  | -0.870905000 |
| 6  | 3.524924000  | 1.133280000  | -1.432140000 |
| 6  | 2.463275000  | 0.303782000  | -1.092287000 |
| 6  | 2.677603000  | -0.718396000 | -0.166414000 |
| 6  | 3.936270000  | -0.915530000 | 0.400547000  |
| 7  | 1.665922000  | -1.662268000 | 0.153850000  |
| 6  | 0.319663000  | -1.584722000 | 0.155740000  |
| 6  | -0.560471000 | -0.517794000 | 0.269248000  |
| 6  | -0.179592000 | 0.830910000  | 0.746646000  |
| 6  | -1.255329000 | 1.817428000  | 0.765376000  |
| 6  | -2.540646000 | 1.502296000  | 0.459374000  |
| 6  | -2.890622000 | 0.162870000  | 0.091861000  |
| 6  | -1.948840000 | -0.809409000 | 0.009691000  |
| 8  | 6.197793000  | -0.312781000 | 0.641949000  |
| 8  | 0.959742000  | 1.101500000  | 1.144595000  |
| 35 | -4.731918000 | -0.226418000 | -0.284293000 |
| 1  | 5.607142000  | 1.612979000  | -1.144199000 |
| 1  | 3.368085000  | 1.932309000  | -2.147112000 |
| 1  | 1.490988000  | 0.440266000  | -1.543905000 |
| 1  | 4.106019000  | -1.696213000 | 1.132834000  |
| 1  | 2.022376000  | -2.602556000 | 0.251814000  |
| 1  | -0.137111000 | -2.567917000 | 0.066221000  |
| 1  | -0.979628000 | 2.821533000  | 1.065544000  |
| 1  | -3.318482000 | 2.255586000  | 0.502404000  |
| 1  | -2.226730000 | -1.817313000 | -0.277839000 |
| 1  | 6.832660000  | 0.356371000  | 0.365999000  |

*Z* keto-amine form V of the *Z*-enol-imine isomer

|    |              |              |              |
|----|--------------|--------------|--------------|
| 6  | 3.958169000  | -0.480374000 | -0.405447000 |
| 6  | 3.780949000  | -1.106845000 | 0.829404000  |
| 6  | 2.813581000  | -0.627521000 | 1.705416000  |
| 6  | 2.021149000  | 0.470344000  | 1.375541000  |
| 6  | 2.197320000  | 1.080241000  | 0.134067000  |
| 6  | 3.164165000  | 0.612028000  | -0.758731000 |
| 7  | 1.445985000  | 2.241309000  | -0.222155000 |
| 6  | 0.113611000  | 2.457663000  | -0.185031000 |
| 6  | -0.965152000 | 1.604667000  | -0.065926000 |
| 6  | -0.914856000 | 0.166575000  | -0.085636000 |
| 6  | -2.063056000 | -0.554938000 | -0.071759000 |
| 6  | -3.351775000 | 0.075874000  | -0.028989000 |
| 6  | -3.457246000 | 1.427822000  | -0.009053000 |
| 6  | -2.284683000 | 2.300770000  | -0.008833000 |
| 8  | -2.393484000 | 3.530608000  | 0.040117000  |
| 35 | -2.005603000 | -2.473214000 | -0.131211000 |
| 8  | 4.918556000  | -0.985934000 | -1.232968000 |
| 1  | 4.402421000  | -1.956555000 | 1.082415000  |
| 1  | 2.681383000  | -1.109584000 | 2.666915000  |
| 1  | 1.280359000  | 0.850796000  | 2.066759000  |
| 1  | 3.280218000  | 1.088788000  | -1.727263000 |
| 1  | 2.003092000  | 3.048045000  | -0.464920000 |
| 1  | -0.158036000 | 3.505195000  | -0.290574000 |
| 1  | 0.036651000  | -0.341804000 | -0.136479000 |
| 1  | -4.238877000 | -0.546712000 | -0.016142000 |
| 1  | -4.423589000 | 1.917042000  | 0.021926000  |
| 1  | 4.936963000  | -0.497092000 | -2.062510000 |

keto-amine form VI of the *Z*-enol-imine isomer

|    |              |              |              |
|----|--------------|--------------|--------------|
| 6  | 4.025025000  | -0.465634000 | -0.375430000 |
| 6  | 3.796343000  | -1.125060000 | 0.833190000  |
| 6  | 2.775096000  | -0.682602000 | 1.672049000  |
| 6  | 1.982706000  | 0.405846000  | 1.325822000  |
| 6  | 2.210593000  | 1.046274000  | 0.103925000  |
| 6  | 3.229073000  | 0.619025000  | -0.745743000 |
| 7  | 1.461416000  | 2.201458000  | -0.265355000 |
| 6  | 0.132956000  | 2.438006000  | -0.210380000 |
| 6  | -0.957140000 | 1.602406000  | -0.068638000 |
| 6  | -0.931355000 | 0.164196000  | -0.103336000 |
| 6  | -2.091121000 | -0.538205000 | -0.073786000 |
| 6  | -3.368230000 | 0.112981000  | -0.000474000 |
| 6  | -3.450595000 | 1.466253000  | 0.132673000  |
| 6  | -2.263422000 | 2.319312000  | 0.020194000  |
| 8  | -2.350146000 | 3.550061000  | 0.085589000  |
| 35 | -2.067185000 | -2.456600000 | -0.155987000 |
| 8  | 5.006305000  | -0.836833000 | -1.248695000 |
| 1  | 4.411739000  | -1.972552000 | 1.117974000  |
| 1  | 2.605394000  | -1.187877000 | 2.615541000  |
| 1  | 1.204118000  | 0.759007000  | 1.988980000  |
| 1  | 3.403873000  | 1.104277000  | -1.698482000 |
| 1  | 2.022666000  | 2.989467000  | -0.555731000 |
| 1  | -0.124020000 | 3.488695000  | -0.320962000 |
| 1  | 0.009895000  | -0.359412000 | -0.183344000 |
| 1  | -4.265131000 | -0.495050000 | 0.023557000  |
| 1  | -4.407782000 | 1.971326000  | 0.085852000  |
| 1  | 5.471966000  | -1.609686000 | -0.911896000 |

keto-amine form VII of the *Z*-enol-imine isomer

|    |              |              |              |
|----|--------------|--------------|--------------|
| 6  | 5.152902000  | -0.650540000 | 0.290538000  |
| 6  | 5.057111000  | 0.630285000  | -0.242898000 |
| 6  | 3.823611000  | 1.080852000  | -0.713798000 |
| 6  | 2.698983000  | 0.259688000  | -0.662669000 |
| 6  | 2.808180000  | -1.013129000 | -0.106112000 |
| 6  | 4.037836000  | -1.478862000 | 0.366560000  |
| 7  | 1.716212000  | -1.918675000 | -0.099539000 |
| 6  | 0.379172000  | -1.751051000 | -0.131948000 |
| 6  | -0.456118000 | -0.698005000 | 0.219975000  |
| 6  | -0.049302000 | 0.453101000  | 1.056102000  |
| 6  | -1.081927000 | 1.457852000  | 1.287716000  |
| 6  | -2.359188000 | 1.307879000  | 0.849498000  |
| 6  | -2.741713000 | 0.136067000  | 0.121085000  |
| 6  | -1.837493000 | -0.831278000 | -0.172708000 |
| 8  | 1.076243000  | 0.547308000  | 1.562088000  |
| 35 | -4.571296000 | -0.037121000 | -0.430509000 |
| 8  | 3.772391000  | 2.344595000  | -1.232419000 |
| 1  | 6.107081000  | -1.004194000 | 0.663172000  |
| 1  | 5.914434000  | 1.289415000  | -0.293564000 |
| 1  | 1.752349000  | 0.604967000  | -1.058305000 |
| 1  | 4.113284000  | -2.467356000 | 0.805579000  |
| 1  | 2.007790000  | -2.875187000 | -0.244742000 |
| 1  | -0.122034000 | -2.644543000 | -0.497584000 |
| 1  | -0.783948000 | 2.327823000  | 1.861248000  |
| 1  | -3.106321000 | 2.064622000  | 1.058225000  |
| 1  | -2.139880000 | -1.710218000 | -0.730987000 |
| 1  | 2.857726000  | 2.592252000  | -1.403849000 |

keto-amine form VIII of the *Z*-enol-imine isomer

|    |              |              |              |
|----|--------------|--------------|--------------|
| 6  | 5.110060000  | -0.607289000 | 0.353986000  |
| 6  | 5.011279000  | 0.669367000  | -0.196015000 |
| 6  | 3.790982000  | 1.093507000  | -0.723389000 |
| 6  | 2.678135000  | 0.255761000  | -0.702976000 |
| 6  | 2.791484000  | -1.010780000 | -0.140204000 |
| 6  | 4.010131000  | -1.454309000 | 0.385473000  |
| 7  | 1.712475000  | -1.932618000 | -0.170857000 |
| 6  | 0.374236000  | -1.766027000 | -0.207148000 |
| 6  | -0.454491000 | -0.727066000 | 0.191158000  |
| 6  | -0.035937000 | 0.381357000  | 1.079494000  |
| 6  | -1.056449000 | 1.388984000  | 1.350755000  |
| 6  | -2.334047000 | 1.271814000  | 0.905418000  |
| 6  | -2.729644000 | 0.134528000  | 0.129168000  |
| 6  | -1.837066000 | -0.829051000 | -0.207097000 |
| 8  | 1.086363000  | 0.434508000  | 1.596311000  |
| 35 | -4.561998000 | 0.005284000  | -0.426701000 |
| 8  | 3.620282000  | 2.326803000  | -1.288498000 |
| 1  | 6.054752000  | -0.938870000 | 0.768644000  |
| 1  | 5.872848000  | 1.329367000  | -0.211608000 |
| 1  | 1.749130000  | 0.603437000  | -1.132282000 |
| 1  | 4.083867000  | -2.438615000 | 0.833529000  |
| 1  | 2.012339000  | -2.880311000 | -0.351432000 |
| 1  | -0.126197000 | -2.640374000 | -0.617567000 |
| 1  | -0.747315000 | 2.233487000  | 1.955322000  |
| 1  | -3.072336000 | 2.029048000  | 1.141917000  |
| 1  | -2.148313000 | -1.679180000 | -0.803787000 |
| 1  | 4.438636000  | 2.830138000  | -1.226442000 |



**Table S2.** B3LYP/6-311++G(d,p) calculated infrared spectra for conformers I, II, V and VI of BHAP (*E*-enol-imine isomer).<sup>a</sup>

| $\nu$  | $I^{\text{IR}}$ | $\nu$  | $I^{\text{IR}}$ | $\nu$  | $I^{\text{IR}}$ | $\nu$  | $I^{\text{IR}}$ |
|--------|-----------------|--------|-----------------|--------|-----------------|--------|-----------------|
| I      |                 | II     |                 | V      |                 | VI     |                 |
| 22.7   | 0.17            | 23.1   | 0.36            | 25.7   | 0.10            | 26.1   | 0.12            |
| 45.9   | 0.50            | 46.1   | 0.18            | 49.1   | 0.17            | 49.1   | 0.48            |
| 51.0   | 0.10            | 50.9   | 0.63            | 56.0   | 0.14            | 55.5   | 0.88            |
| 110.6  | 0.79            | 110.6  | 1.88            | 109.0  | 1.02            | 108.8  | 1.65            |
| 140.0  | 0.58            | 140.1  | 0.71            | 137.7  | 0.42            | 137.5  | 0.69            |
| 156.5  | 0.38            | 156.6  | 1.50            | 151.6  | 0.66            | 151.7  | 0.53            |
| 183.5  | 1.11            | 183.8  | 1.86            | 196.0  | 1.60            | 195.2  | 1.86            |
| 227.9  | 1.96            | 228.8  | 1.08            | 231.3  | 3.12            | 232.2  | 1.34            |
| 266.0  | 4.51            | 266.3  | 3.89            | 262.4  | 4.60            | 261.8  | 2.97            |
| 274.4  | 2.5             | 274.4  | 5.81            | 274.0  | 2.81            | 273.5  | 3.10            |
| 292.6  | 0.39            | 292.5  | 1.82            | 293.5  | 0.05            | 293.1  | 1.37            |
| 299.3  | 104.68          | 318.1  | 102.16          | 314.7  | 6.79            | 315.9  | 4.05            |
| 327.7  | 2.68            | 327.8  | 1.83            | 320.0  | 103.91          | 317.9  | 103.87          |
| 348.6  | 0.36            | 347.9  | 1.45            | 347.4  | 0.64            | 347.6  | 0.56            |
| 401.2  | 11.65           | 402.0  | 2.11            | 404.9  | 8.06            | 403.9  | 5.97            |
| 448.8  | 0.87            | 449.6  | 5.45            | 449.5  | 1.10            | 449.8  | 4.38            |
| 461.3  | 6.33            | 462.5  | 7.23            | 457.7  | 1.12            | 458.0  | 5.27            |
| 474.4  | 13.39           | 476.1  | 7.31            | 477.3  | 15.91           | 478.2  | 12.07           |
| 520.6  | 10.73           | 520.8  | 2.58            | 516.2  | 17.41           | 514.8  | 1.09            |
| 533.7  | 0.15            | 533.7  | 1.35            | 530.8  | 1.48            | 531.3  | 0.95            |
| 555.9  | 5.30            | 555.2  | 6.08            | 552.7  | 4.79            | 553.3  | 4.07            |
| 562.6  | 12.23           | 563.8  | 9.94            | 574.1  | 10.14           | 573.9  | 16.78           |
| 620.7  | 5.17            | 623.8  | 5.69            | 624.7  | 8.06            | 624.2  | 5.90            |
| 634.6  | 20.74           | 635.4  | 22.21           | 635.8  | 16.53           | 635.4  | 22.32           |
| 684.1  | 15.67           | 685.2  | 15.16           | 686.0  | 16.75           | 685.1  | 16.35           |
| 692.4  | 21.88           | 694.3  | 22.88           | 695.7  | 25.80           | 694.9  | 22.62           |
| 729.0  | 1.24            | 728.8  | 1.49            | 729.0  | 1.13            | 728.3  | 1.94            |
| 779.5  | 9.55            | 775.9  | 34.01           | 774.9  | 6.42            | 766.5  | 31.46           |
| 786.7  | 22.94           | 779.0  | 11.85           | 780.4  | 20.54           | 777.2  | 6.29            |
| 802.2  | 8.92            | 805.0  | 7.86            | 813.2  | 7.16            | 812.8  | 9.62            |
| 827.8  | 84.76           | 828.0  | 80.95           | 827.8  | 83.95           | 827.5  | 85.23           |
| 837.6  | 23.13           | 851.8  | 16.90           | 848.8  | 4.55            | 849.8  | 16.98           |
| 851.3  | 27.92           | 866.3  | 12.84           | 856.2  | 42.42           | 860.0  | 1.39            |
| 881.7  | 9.99            | 874.1  | 8.22            | 880.0  | 5.20            | 878.3  | 4.30            |
| 890.6  | 3.19            | 884.3  | 17.90           | 883.7  | 9.64            | 884.3  | 26.64           |
| 916.6  | 13.75           | 917.1  | 16.23           | 919.5  | 17.42           | 919.7  | 22.58           |
| 958.8  | 0.40            | 958.4  | 0.46            | 958.6  | 0.04            | 958.4  | 0.17            |
| 978.5  | 47.35           | 970.2  | 1.72            | 969.8  | 53.61           | 959.8  | 0.15            |
| 980.3  | 3.94            | 978.2  | 94.91           | 973.5  | 0.10            | 967.3  | 102.62          |
| 998.9  | 8.19            | 998.2  | 9.06            | 994.4  | 10.83           | 994.6  | 12.87           |
| 1006.0 | 3.20            | 1007.9 | 2.18            | 1005.4 | 7.15            | 1004.4 | 5.38            |
| 1085.2 | 16.57           | 1085.2 | 15.91           | 1084.1 | 15.73           | 1084.0 | 15.40           |
| 1090.0 | 10.15           | 1097.4 | 10.81           | 1095.7 | 13.00           | 1104.3 | 7.41            |
| 1144.7 | 7.80            | 1144.6 | 8.91            | 1144.6 | 7.08            | 1144.6 | 11.99           |
| 1159.9 | 192.64          | 1156.5 | 192.27          | 1158.5 | 160.77          | 1147.9 | 182.24          |
| 1182.3 | 77.39           | 1175.7 | 36.17           | 1178.0 | 28.77           | 1178.2 | 18.14           |
| 1184.2 | 94.52           | 1194.6 | 41.45           | 1186.9 | 169.23          | 1196.6 | 61.24           |
| 1213.1 | 31.42           | 1215.4 | 57.53           | 1215.4 | 56.05           | 1216.7 | 52.27           |
| 1250.4 | 18.13           | 1250.8 | 17.94           | 1249.8 | 9.74            | 1249.6 | 19.41           |
| 1284.5 | 81.72           | 1282.7 | 47.47           | 1292.9 | 28.68           | 1291.5 | 36.08           |
| 1304.6 | 81.83           | 1304.2 | 79.51           | 1302.9 | 131.61          | 1303.0 | 85.34           |
| 1328.1 | 2.49            | 1318.7 | 92.19           | 1326.2 | 1.70            | 1316.5 | 137.51          |
| 1335.1 | 1.71            | 1334.9 | 5.00            | 1334.8 | 2.83            | 1334.6 | 6.65            |
| 1338.3 | 9.73            | 1338.8 | 16.45           | 1338.8 | 2.96            | 1339.0 | 2.24            |
| 1372.7 | 47.63           | 1373.8 | 34.526          | 1371.9 | 40.64           | 1371.7 | 17.22           |
| 1418.6 | 34.09           | 1419.1 | 31.19           | 1418.2 | 25.92           | 1417.8 | 51.02           |
| 1467.7 | 44.47           | 1469.6 | 15.53           | 1464.1 | 52.23           | 1466.7 | 16.00           |
| 1469.7 | 29.51           | 1485.5 | 10.71           | 1478.2 | 87.27           | 1489.5 | 81.19           |
| 1495.1 | 132.13          | 1494.6 | 156.07          | 1496.9 | 81.64           | 1497.4 | 37.28           |
| 1518.0 | 60.17           | 1507.4 | 87.04           | 1514.8 | 63.04           | 1504.5 | 126.55          |
| 1588.4 | 159.41          | 1589.0 | 141.37          | 1588.5 | 173.04          | 1588.8 | 153.68          |
| 1617.5 | 194.62          | 1612.2 | 114.30          | 1617.6 | 80.99           | 1608.1 | 67.49           |
| 1623.5 | 84.36           | 1627.3 | 245.11          | 1623.9 | 272.72          | 1629.3 | 346.86          |
| 1644.3 | 17.74           | 1644.7 | 14.50           | 1644.6 | 23.95           | 1644.7 | 28.059          |
| 1656.2 | 144.18          | 1658.1 | 117.52          | 1656.5 | 97.93           | 1660.4 | 75.63           |
| 2872.2 | 37.41           | 2877.4 | 34.47           | 2878.3 | 34.13           | 2876.2 | 34.61           |
| 2985.2 | 7.50            | 2983.9 | 10.30           | 2991.0 | 7.78            | 2983.8 | 9.26            |
| 3001.4 | 10.11           | 3005.8 | 17.87           | 2998.2 | 8.52            | 3002.4 | 14.72           |
| 3008.9 | 0.98            | 3009.9 | 1.38            | 3008.2 | 1.29            | 3008.0 | 1.12            |
| 3014.9 | 2.28            | 3014.8 | 4.04            | 3014.4 | 4.46            | 3014.5 | 3.23            |
| 3020.8 | 6.34            | 3019.4 | 1.97            | 3015.9 | 4.44            | 3018.1 | 8.41            |
| 3026.5 | 4.32            | 3023.9 | 5.01            | 3025.6 | 11.12           | 3025.2 | 1.68            |
| 3028.5 | 2.59            | 3028.4 | 4.16            | 3027.7 | 2.81            | 3027.8 | 2.41            |
| 3040.3 | 533.91          | 3033.6 | 538.05          | 3033.1 | 536.05          | 3036.8 | 546.02          |
| 3623.9 | 55.08           | 3625.1 | 84.34           | 3622.9 | 66.48           | 3625.4 | 87.62           |

<sup>a</sup> Frequencies ( $\nu$ , in  $\text{cm}^{-1}$ ) have been scaled by 0.994 or 0.945 below and above  $1800 \text{ cm}^{-1}$ , respectively. Infrared intensities ( $I^{\text{IR}}$ ) in  $\text{km mol}^{-1}$ .
